# Supplementary material
Source: publisher site journal article supplement (https://www.spandidos-publications.com/8402/downloadSupplementary)
Supplement: Supplementary file 1 [file downloadSupplementary]

## Sheet: Sheet1
Table SI. TCGA-BRCA single gene differential analysis results.
gene_name	baseMean	log2FoldChange	lfcSE	stat	pvalue	padj	sig
DDX11L1	0.260403	0.536731	0.513322	1.0456	0.295744	0.379324	none
WASH7P	48.971	0.529266	0.117138	4.51832	6.23316e-06	1.59782e-05	none
MIR6859-1	1.43189	0.425584	0.201959	2.10728	0.0350935	0.0555512	none
MIR1302-2HG	0.0797973	0.0769712	0.765915	0.100496	0.919951		none
MIR1302-2	0
FAM138A	0.0273234	0.0235563	1.81959	0.0129459	0.989671		none
OR4G4P	0.0270735	0.00540431	2.36194	0.00228808	0.998174		none
OR4G11P	0.0844392	0.140216	1.83792	0.0762904	0.939188		none
OR4F5	0.0537754	0.0905709	1.64031	0.0552158	0.955967		none
AL627309.1	1.01423	0.386107	0.2647	1.45866	0.144659	0.201718	none
AL627309.3	0
CICP27	3.91043	0.856902	0.193293	4.43317	9.28563e-06	2.33726e-05	none
AL627309.6	79.4931	1.02229	0.157636	6.48512	8.86632e-11	3.35529e-10	up
AL627309.7	45.2635	0.433849	0.152991	2.83579	0.00457128	0.00833672	none
AL627309.2	0.618227	0.57077	0.287422	1.98583	0.0470525	0.0726319	none
AL627309.5	12.2502	-0.519357	0.119105	-4.36049	1.2977e-05	3.21321e-05	none
RNU6-1100P	0.0262039	-0.00716506	2.08415	-0.00343788	0.997257		none
AL627309.4	0.0186254	0.0331244	3.58838	0.00923101	0.992635		none
FO538757.1	3.07644	0.133418	0.249215	0.535352	0.592406	0.67731	none
WASH9P	103.192	0.112584	0.0823339	1.36741	0.171496	0.234757	none
MIR6859-2	0.488375	-0.109116	0.287154	-0.379991	0.703952	0.773095	none
AP006222.1	19.0061	-1.01711	0.121979	-8.33841	7.52943e-17	4.07513e-16	down
AP006222.2	1.35522	1.92651	0.376222	5.12069	3.04426e-07	8.79907e-07	up
RPL23AP24	0.0453471	-0.0704097	1.21017	-0.0581816	0.953604		none
AL732372.1	0.19944	0.510024	0.564651	0.903256	0.36639	0.455597	none
AL732372.2	25.8787	-0.19993	0.115602	-1.72946	0.0837264	0.122861	none
WBP1LP7	0.00616862	0.00976593	4.99129	0.0019566	0.998439		none
OR4F29	0.00898153	0.0227522	3.74384	0.00607722	0.995151		none
CICP7	0.0124005	0.0383216	2.71678	0.0141055	0.988746		none
AL732372.3	0.122395	0.0430177	0.583928	0.0736694	0.941273		none
U6	0.0310682	0.0461021	2.43315	0.0189475	0.984883		none
AL669831.3	5.98803	-0.256255	0.0996339	-2.57196	0.0101124	0.0175375	none
AC114498.1	0.00215886	0.00198879	4.99129	0.000398453	0.999682		none
MTND1P23	1165.86	2.25686	0.305402	7.38979	1.47061e-13	6.63761e-13	up
MTND2P28	7990.2	-0.839672	0.128284	-6.5454	5.93377e-11	2.27457e-10	none
MTCO1P12	5118.97	-0.144091	0.1179	-1.22214	0.221653	0.294516	none
AC114498.2	0
MTCO2P12	75.1016	0.324973	0.135086	2.40567	0.0161428	0.0270937	none
MTATP8P1	7.19843	-0.564709	0.151441	-3.72889	0.000192323	0.000419415	none
MTATP6P1	19749	-0.555289	0.101922	-5.44818	5.08874e-08	1.56993e-07	none
MTCO3P12	165.105	0.347774	0.16451	2.11399	0.0345157	0.0546967	none
WBP1LP6	0.0595882	0.114296	1.17485	0.0972858	0.922499		none
OR4F16	0.00247684	0.00198879	4.99129	0.000398453	0.999682		none
CICP3	1.67408	0.209228	0.186688	1.12073	0.262401	0.341722	none
AL669831.1	104.515	-0.334526	0.0745309	-4.48842	7.17525e-06	1.828e-05	none
RNU6-1199P	0.13082	0.225772	0.970217	0.232702	0.815992		none
AL669831.2	0.141024	-0.00442795	1.0699	-0.00413866	0.996698		none
LINC01409	59.9464	0.394065	0.109232	3.60761	0.000309031	0.000657909	none
AL669831.6	0
AL669831.4	6.57492	-0.11874	0.112923	-1.05151	0.293023	0.37637	none
FAM87B	11.2432	-1.35478	0.107407	-12.6136	1.77764e-36	2.32368e-35	down
LINC01128	898.837	-0.615994	0.0581935	-10.5853	3.4881e-26	2.96983e-25	none
LINC00115	26.5764	0.819193	0.0924459	8.86133	7.90671e-19	4.71059e-18	none
AL669831.7	2.7102	0.0130189	0.234076	0.0556181	0.955646	0.967526	none
FAM41C	0.763855	-0.806925	0.256489	-3.14604	0.00165496	0.00321569	none
TUBB8P11	1.42938	-0.760425	0.179553	-4.2351	2.28454e-05	5.51376e-05	none
AL669831.5	0.218111	-1.69843	0.508921	-3.33732	0.000845901	0.00170554	down
AL645608.6	10.1935	2.33564	0.224278	10.4141	2.13876e-25	1.7584e-24	up
AL645608.2	27.4282	2.28376	0.205861	11.0937	1.34601e-28	1.27506e-27	up
AL645608.4	0.105859	0.207234	1.08077	0.191747	0.847941		none
LINC02593	308.007	2.24825	0.186449	12.0583	1.75391e-33	2.04426e-32	up
SAMD11	379.013	2.70957	0.183847	14.7381	3.66865e-49	7.59081e-48	up
NOC2L	5183.51	0.748812	0.0634082	11.8094	3.49101e-32	3.84916e-31	none
KLHL17	390.199	1.01947	0.0837837	12.1679	4.60845e-34	5.50688e-33	up
PLEKHN1	284.689	1.20437	0.105178	11.4508	2.33089e-30	2.3851e-29	up
PERM1	26.0707	1.00586	0.142282	7.06945	1.55551e-12	6.62687e-12	up
AL645608.7	122.949	1.17831	0.147669	7.97942	1.47024e-15	7.46811e-15	up
HES4	431.794	1.34181	0.128865	10.4125	2.1743e-25	1.78698e-24	up
ISG15	7036.29	3.53708	0.169186	20.9065	4.67222e-97	3.8739e-95	up
AL645608.3	1.07903	0.510892	0.274645	1.86019	0.0628587	0.0945619	none
AL645608.1	8.40386	0.59703	0.133989	4.4558	8.35795e-06	2.1143e-05	none
AGRN	13302.4	0.649566	0.0833122	7.79677	6.35131e-15	3.11556e-14	none
AL645608.5	0
AL390719.1	196.326	1.39117	0.114002	12.203	2.99397e-34	3.60798e-33	up
AL645608.8	7.07688	1.68836	0.183714	9.19018	3.92186e-20	2.49683e-19	up
RNF223	209.473	1.59511	0.140513	11.352	7.24577e-30	7.27332e-29	up
C1orf159	790.884	1.0168	0.0780838	13.022	9.17953e-39	1.30867e-37	up
AL390719.3	15.989	1.32745	0.128394	10.3389	4.7008e-25	3.80689e-24	up
LINC01342	19.123	0.9815	0.182303	5.3839	7.28895e-08	2.21861e-07	none
MIR200B	2.60753	0.538613	0.226401	2.37902	0.0173586	0.0289713	none
MIR200A	4.67526	0.167924	0.187847	0.893939	0.371354	0.460747	none
MIR429	12.2645	0.571171	0.148241	3.85298	0.000116687	0.000260887	none
AL390719.2	142.155	1.13094	0.131746	8.58429	9.13993e-18	5.16782e-17	up
TTLL10-AS1	4.83806	-2.04845	0.161838	-12.6574	1.01866e-36	1.34767e-35	down
TTLL10	23.2938	-1.34452	0.125387	-10.7229	7.94696e-27	6.96367e-26	down
TNFRSF18	533.749	2.93218	0.152175	19.2684	9.89693e-83	5.6543e-81	up
TNFRSF4	222.08	1.28815	0.116557	11.0517	2.15214e-28	2.02202e-27	up
SDF4	7634.79	0.393142	0.0608321	6.46273	1.02831e-10	3.8774e-10	none
B3GALT6	1788.4	0.612625	0.0654531	9.35975	7.99274e-21	5.28333e-20	none
C1QTNF12	44.1407	0.941552	0.149357	6.30401	2.90033e-10	1.06146e-09	none
AL162741.1	9.33345	0.0308082	0.120019	0.256695	0.797415	0.84705	none
UBE2J2	2557.67	0.453586	0.0539595	8.40604	4.24082e-17	2.3204e-16	none
LINC01786	23.6444	0.330448	0.123296	2.68012	0.00735953	0.0130361	none
SCNN1D	257.078	0.729392	0.122925	5.93365	2.96277e-09	1.00756e-08	none
ACAP3	2131.19	0.705208	0.0761466	9.2612	2.02155e-20	1.30823e-19	none
MIR6726	0.00687612	0.017548	4.76411	0.00368337	0.997061		none
PUSL1	504.83	1.24267	0.0827548	15.0163	5.74053e-51	1.26105e-49	up
INTS11	4478.78	0.349397	0.0538214	6.49178	8.48269e-11	3.21462e-10	none
MIR6727	0
AL139287.1	147.362	0.198468	0.0669901	2.96265	0.00305005	0.00570444	none
CPTP	1902.49	0.608701	0.0781626	7.78762	6.82824e-15	3.3438e-14	none
TAS1R3	141.522	2.15597	0.153433	14.0516	7.53596e-45	1.34169e-43	up
DVL1	3128.79	0.437134	0.077598	5.63331	1.76781e-08	5.66505e-08	none
MIR6808	0
MXRA8	8139.75	0.0124865	0.109644	0.113882	0.909331	0.933536	none
AURKAIP1	3913.5	0.881147	0.0948703	9.28792	1.57335e-20	1.02424e-19	none
NDUFB4P8	1.66013	-0.0344551	0.159614	-0.215865	0.829093	0.871159	none
CCNL2	5117.49	-0.0177413	0.0742282	-0.23901	0.811098	0.857152	none
MRPL20-AS1	1052.66	0.572824	0.0621879	9.21119	3.22529e-20	2.06539e-19	none
MRPL20	3340.39	0.340206	0.0610377	5.5737	2.49385e-08	7.89853e-08	none
RN7SL657P	0
MRPL20-DT	163.998	0.968835	0.0891384	10.8689	1.62168e-27	1.46664e-26	none
ANKRD65	447.276	-1.17143	0.119155	-9.83116	8.26584e-23	6.01335e-22	down
AL391244.1	14.9762	0.142865	0.149317	0.956788	0.338674	0.426467	none
TMEM88B	1.58408	0.525633	0.227077	2.31478	0.0206249	0.0339662	none
LINC01770	105.699	0.683669	0.132383	5.16434	2.41295e-07	7.03767e-07	none
VWA1	6155.44	1.04568	0.0898776	11.6345	2.7529e-31	2.91902e-30	up
ATAD3C	484.533	0.40724	0.145922	2.79081	0.00525765	0.00950619	none
ATAD3B	952.75	0.710812	0.0985882	7.20991	5.59886e-13	2.45048e-12	none
AL645728.2	27.325	0.139207	0.108048	1.28838	0.197614	0.266116	none
ATAD3A	1282.37	1.06206	0.0890367	11.9284	8.42229e-33	9.51943e-32	up
TMEM240	39.6998	-0.214365	0.113202	-1.89365	0.0582718	0.0882774	none
SSU72	7263.37	0.163464	0.0552443	2.95894	0.00308699	0.00577141	none
AL645728.1	47.4284	-0.131486	0.0793955	-1.65608	0.0977049	0.141456	none
AL691432.3	0.0679772	-0.194708	1.00073	-0.194566	0.845733		none
FNDC10	1060.03	1.75151	0.106533	16.4409	9.74429e-61	2.83646e-59	up
AL691432.4	65.0693	1.8372	0.124003	14.8157	1.15942e-49	2.44185e-48	up
AL691432.2	366.245	-0.113997	0.0761909	-1.4962	0.134601	0.188976	none
MIB2	1202.03	0.111873	0.0896198	1.24831	0.211917	0.282955	none
MMP23B	6.36437	0.308933	0.178861	1.72723	0.0841272	0.123381	none
CDK11B	1630.75	0.15969	0.0489022	3.26551	0.00109269	0.00217373	none
FO704657.1	1.62953	-0.0642655	0.152514	-0.421375	0.673481	0.747871	none
SLC35E2B	3560.71	-0.00361021	0.0725503	-0.0497615	0.960312	0.971009	none
AL691432.1	91.084	0.15054	0.119662	1.25805	0.208375	0.2788	none
MMP23A	12.6534	-0.297548	0.234604	-1.2683	0.204692	0.274577	none
CDK11A	55.8802	0.293445	0.091141	3.21968	0.00128334	0.0025288	none
AL031282.2	71.1023	-0.104362	0.0901726	-1.15736	0.247124	0.324312	none
AL031282.1	317.589	-0.249104	0.103009	-2.41828	0.015594	0.0262504	none
SLC35E2A	131.773	-0.206937	0.0871229	-2.37523	0.0175381	0.0292338	none
NADK	3471.35	-0.128154	0.046361	-2.76427	0.00570509	0.0102695	none
GNB1	25436.6	0.179626	0.0417534	4.30208	1.69205e-05	4.14188e-05	none
AL109917.1	24.558	-0.0374264	0.124807	-0.299875	0.764273	0.821195	none
CALML6	32.705	0.96337	0.155105	6.21107	5.26251e-10	1.88762e-09	none
TMEM52	123.801	0.973088	0.14024	6.93874	3.95612e-12	1.6429e-11	none
CFAP74	35.5258	1.06125	0.174455	6.08325	1.17768e-09	4.12722e-09	up
AL391845.2	13.9618	2.7148	0.139034	19.5261	6.58948e-85	4.04654e-83	up
GABRD	217.697	3.21651	0.116248	27.6695	1.62642e-168	6.49634e-166	up
AL391845.1	1.55602	2.08959	0.270486	7.72531	1.11579e-14	5.39785e-14	up
PRKCZ	763.37	0.783505	0.069485	11.2759	1.72641e-29	1.70356e-28	none
AL590822.2	4.75505	0.845446	0.176365	4.79374	1.63703e-06	4.44076e-06	none
PRKCZ-AS1	104.246	-0.256647	0.0792572	-3.23815	0.00120309	0.00238129	none
FAAP20	1937	0.754776	0.0823142	9.16944	4.75463e-20	3.01448e-19	none
AL590822.1	1.8518	-0.439216	0.200372	-2.192	0.0283796	0.0456871	none
SKI	5953.24	-0.672324	0.0535461	-12.556	3.68502e-36	4.76676e-35	none
AL590822.3	116.624	0.169003	0.125655	1.34497	0.178635	0.243326	none
MORN1	470.693	0.505619	0.0775452	6.52031	7.01608e-11	2.67583e-10	none
AL589739.1	6.72001	0.441937	0.172975	2.55491	0.0106215	0.0183631	none
AL513477.1	171.251	0.0234137	0.0996242	0.235021	0.814193	0.859651	none
AL513477.2	24.7958	0.258212	0.104223	2.47751	0.0132304	0.0225265	none
RER1	6089.26	0.454268	0.0479863	9.46662	2.89034e-21	1.94784e-20	none
PEX10	809.516	0.142607	0.0574059	2.4842	0.0129845	0.0221416	none
PLCH2	533.106	-1.28825	0.141367	-9.11281	8.02774e-20	5.02311e-19	down
AL139246.1	4.35135	-0.00290849	0.204286	-0.0142374	0.988641	0.99175	none
AL139246.4	4.31849	0.201546	0.216783	0.929713	0.35252	0.441072	none
PANK4	1105.03	0.162786	0.0489462	3.32581	0.000881609	0.00177294	none
HES5	7.08066	0.294482	0.160217	1.83802	0.0660599	0.0990208	none
AL139246.5	93.4336	1.99877	0.143656	13.9136	5.23414e-44	8.99795e-43	up
TNFRSF14-AS1	156.177	0.280865	0.117834	2.38356	0.0171462	0.0286409	none
TNFRSF14	2223.33	0.127665	0.0858096	1.48778	0.13681	0.191768	none
AL139246.2	4.76137	0.243712	0.148282	1.64357	0.100265	0.144798	none
AL139246.3	12.374	-0.257864	0.115457	-2.23341	0.0255217	0.0413879	none
PRXL2B	2447.38	0.977009	0.0707756	13.8043	2.40051e-43	4.03754e-42	none
MMEL1	137.872	1.19038	0.118931	10.009	1.39152e-23	1.05354e-22	up
MMEL1-AS1	0.0689324	0.0462491	1.39	0.0332728	0.973457		none
TTC34	74.7404	-0.351473	0.140642	-2.49906	0.0124522	0.0212949	none
AC242022.2	0.692738	0.754915	0.358847	2.10372	0.0354027	0.0560021	none
AC242022.1	0.963263	0.496503	0.338015	1.46888	0.141866	0.198142	none
AL592464.2	0.0179593	0.0409046	3.39451	0.0120502	0.990386		none
AL592464.3	0.226895	0.67149	0.925278	0.725717	0.468012	0.560302	none
AL592464.1	0.0725736	0.217211	1.57863	0.137595	0.890561		none
AL589702.1	0.140483	0.222589	0.939368	0.236956	0.812691		none
ACTRT2	0.0824137	-0.0822027	1.4021	-0.0586282	0.953248		none
PRDM16-DT	27.7613	-2.26799	0.146626	-15.4678	5.72091e-54	1.37153e-52	down
PRDM16	92.866	-1.61861	0.131081	-12.3482	4.98414e-35	6.18593e-34	down
MIR4251	0.0467074	-0.0245285	1.64342	-0.0149253	0.988092		none
AL008733.1	0.866114	0.508225	0.442783	1.1478	0.251053	0.328843	none
AL512383.1	0.343478	-0.831434	0.403219	-2.06199	0.0392088	0.0615144	none
AL590438.1	4.22662	2.45497	0.205932	11.9212	9.17421e-33	1.0354e-31	up
AL354743.2	7.48116	1.82111	0.150395	12.1088	9.48752e-34	1.12002e-32	up
AL354743.1	3.06955	-1.49132	0.209344	-7.12377	1.05017e-12	4.51969e-12	down
ARHGEF16	1458.77	1.18858	0.0857537	13.8603	1.10144e-43	1.87731e-42	up
AL512413.1	7.45697	0.749731	0.145544	5.15123	2.5879e-07	7.52587e-07	none
MEGF6	2069.68	0.0188475	0.101976	0.184822	0.853368	0.889665	none
MIR551A	0.0643542	0.0684103	1.48586	0.0460408	0.963278		none
AL513320.1	17.1893	0.494512	0.126683	3.90355	9.4793e-05	0.000213925	none
TPRG1L	4154.56	-0.499784	0.0493869	-10.1198	4.51515e-24	3.49981e-23	none
WRAP73	1214.59	0.527225	0.0497402	10.5996	2.99338e-26	2.5543e-25	none
TP73	297.755	0.246623	0.119588	2.06228	0.0391815	0.0614758	none
TP73-AS3	3.71353	3.44738	0.282058	12.2222	2.36499e-34	2.86254e-33	up
TP73-AS2	0.668989	0.863636	0.326223	2.64738	0.00811182	0.0142784	none
TP73-AS1	1378.72	-0.447161	0.057891	-7.72419	1.12571e-14	5.44354e-14	none
AL136528.1	0
CCDC27	6.32861	-0.89366	0.139074	-6.42577	1.312e-10	4.91282e-10	none
SMIM1	155.692	1.30848	0.119427	10.9562	6.202e-28	5.70564e-27	up
LRRC47	3189.96	0.123003	0.0425135	2.89326	0.00381267	0.0070362	none
RN7SL574P	8.08831	0.470786	0.130212	3.61553	0.000299731	0.000639206	none
AL365330.1	29.1156	0.397935	0.0854234	4.65838	3.18705e-06	8.4115e-06	none
CEP104	2342.91	-0.113493	0.042396	-2.67698	0.00742881	0.0131487	none
DFFB	372.887	0.175874	0.052527	3.34826	0.000813204	0.00164344	none
C1orf174	1261.6	0.200949	0.0404971	4.96206	6.97488e-07	1.95404e-06	none
LINC01134	31.2404	0.32146	0.110902	2.8986	0.00374838	0.00692285	none
LINC01346	0.353267	0.035169	0.455341	0.0772366	0.938435	0.955027	none
LINC01345	0.189617	0.211739	0.747221	0.283369	0.776894	0.830966	none
LINC02780	0.652062	1.69037	0.717552	2.35575	0.0184854	0.0307136	up
AL805961.1	0.921929	0.331027	0.315477	1.04929	0.294044	0.37746	none
EEF1DP6	0.216548	0.156942	0.386679	0.405872	0.684836	0.757368	none
LINC01777	1.19704	-1.3911	0.428837	-3.24389	0.00117909	0.00233662	down
AL355602.1	0.132076	0.126617	1.03872	0.121897	0.902981		none
Z98747.1	0.00757313	0.0175488	4.72603	0.00371322	0.997037		none
LINC01646	0.179476	0.00836777	0.706728	0.0118401	0.990553	0.993061	none
AJAP1	85.7029	-0.686056	0.146094	-4.69598	2.6533e-06	7.05345e-06	none
Z98886.1	1.24754	1.2606	0.394747	3.19343	0.00140591	0.00275626	up
BX005132.1	0.0234534	0.0538502	4.33625	0.0124186	0.990092		none
LINC02781	0.0813326	0.0532442	1.71117	0.0311156	0.975177		none
LINC02782	0.0525059	0.0654291	1.26917	0.0515525	0.958885		none
AL139823.1	0.0735162	0.00657902	1.88073	0.00349811	0.997209		none
Z98259.3	2.53436	-1.04408	0.418815	-2.49295	0.0126688	0.0216394	down
Z98259.2	0.0978316	0.192068	1.31378	0.146196	0.883767		none
Z98259.1	0.33042	-1.11181	0.531863	-2.0904	0.0365816	0.0577059	none
Z97988.2	0.00856135	0.00976593	4.99129	0.0019566	0.998439		none
AL365255.1	1.54678	1.39806	0.326626	4.28031	1.86631e-05	4.54521e-05	up
Z97988.1	0.0385314	-0.042284	1.4086	-0.0300184	0.976052		none
MIR4689	0.245928	-1.01271	0.349599	-2.89679	0.00377	0.00696054	down
NPHP4	840.292	0.148242	0.0533115	2.78067	0.00542462	0.00979113	none
KCNAB2	1234.42	0.42947	0.0873652	4.9158	8.84185e-07	2.45625e-06	none
CHD5	34.415	1.07584	0.185915	5.78675	7.17614e-09	2.37348e-08	up
AL031847.1	0.119402	0.13919	0.818258	0.170105	0.864928		none
RPL22	8351.67	-0.485927	0.0563326	-8.62603	6.35194e-18	3.62492e-17	none
RNF207-AS1	25.9489	0.337217	0.123182	2.73754	0.00619005	0.0110765	none
RNF207	477.379	-0.00315631	0.0941288	-0.0335319	0.97325	0.980272	none
ICMT	6486.04	0.0954561	0.0419	2.27819	0.0227154	0.0371544	none
LINC00337	23.7229	2.6417	0.144482	18.284	1.10943e-74	5.04061e-73	up
HES3	0.0940043	0.110282	0.969139	0.113794	0.909401		none
GPR153	943.801	-0.228937	0.0912732	-2.50826	0.0121326	0.0207839	none
ACOT7	1789.21	1.40789	0.0862841	16.3169	7.48471e-60	2.11571e-58	up
AL031848.2	12.4883	0.137354	0.107627	1.2762	0.201883	0.271205	none
HES2	356.898	1.93819	0.189253	10.2413	1.29486e-24	1.02916e-23	up
ESPN	1273.77	1.81854	0.142056	12.8016	1.607e-37	2.19624e-36	up
MIR4252	0.221586	0.613248	0.421099	1.4563	0.145309	0.202519	none
AL031848.1	18.8171	2.10157	0.195746	10.7362	6.88333e-27	6.04202e-26	up
TNFRSF25	436.737	0.369062	0.105676	3.4924	0.000478704	0.000996186	none
PLEKHG5	979.605	-0.779847	0.085997	-9.0683	1.20887e-19	7.49878e-19	none
NOL9	1520.84	-0.0551871	0.0454114	-1.21527	0.224264	0.297641	none
RNU6-731P	0.530549	0.090386	0.375967	0.24041	0.810013	0.856261	none
AL591866.1	5.62421	-0.662735	0.142142	-4.66248	3.12421e-06	8.25325e-06	none
TAS1R1	13.5603	-0.859629	0.151146	-5.68743	1.28969e-08	4.17364e-08	none
ZBTB48	1051.94	0.208084	0.0608974	3.41696	0.000633234	0.00129829	none
KLHL21	3390.02	-1.12683	0.0720468	-15.6403	3.87167e-55	9.6548e-54	down
PHF13	2344.75	-0.0389563	0.0408545	-0.953538	0.340318	0.428181	none
THAP3	744.961	0.00341791	0.0621976	0.0549525	0.956176	0.967883	none
DNAJC11	1709.16	0.0820272	0.0479045	1.71231	0.0868402	0.127018	none
LINC01672	0.26941	0.129374	0.382701	0.338055	0.735322	0.798343	none
AL591163.1	0.214574	-0.0703547	0.427298	-0.16465	0.869219	0.902176	none
CAMTA1-DT	14.1829	0.399937	0.11297	3.54019	0.000399832	0.000840044	none
CAMTA1	1858.97	-0.036302	0.0556592	-0.65222	0.514259	0.605319	none
AL590128.1	1.30942	1.07955	0.434362	2.48536	0.012942	0.0220773	up
AL512330.1	0.0687683	0.0580419	1.24622	0.0465745	0.962852		none
RNU1-8P	0.226785	0.517417	1.27931	0.404448	0.685883	0.758288	none
CAMTA1-IT1	0.889679	0.8253	0.272354	3.03024	0.00244358	0.00463454	none
CAMTA1-AS2	0.372357	0.524722	0.444532	1.18039	0.237845	0.313581	none
CAMTA1-AS1	2.43811	-0.783227	0.194688	-4.02298	5.74662e-05	0.000132993	none
AL359881.3	7.06774	-0.733445	0.182993	-4.00805	6.1222e-05	0.000141187	none
AL359881.2	8.05453	0.032496	0.169896	0.19127	0.848314	0.885803	none
AL359881.1	13.1133	0.265237	0.162075	1.63651	0.101734	0.146707	none
VAMP3	5762.2	-0.77625	0.0403532	-19.2364	1.83576e-82	1.03592e-80	none
Z98884.2	22.2647	0.181023	0.0808132	2.24001	0.0250901	0.0407413	none
PER3	1687.67	-0.960482	0.0867651	-11.0699	1.75578e-28	1.65571e-27	none
Z98884.1	8.21666	-0.77672	0.136836	-5.6763	1.37642e-08	4.4446e-08	none
UTS2	14.4331	2.17999	0.211436	10.3104	6.3233e-25	5.08766e-24	up
TNFRSF9	194.333	2.70586	0.147125	18.3916	1.53527e-75	7.17408e-74	up
AL009183.1	0.0891327	0.169129	0.781163	0.216509	0.828591		none
PARK7	11421.1	0.32938	0.057455	5.73283	9.87669e-09	3.22809e-08	none
Y_RNA	0.0708123	0.100941	1.6307	0.0619003	0.950642		none
AL034417.4	33.363	-0.175942	0.099213	-1.77338	0.0761666	0.112681	none
AL034417.3	3.2015	-0.104074	0.141002	-0.738102	0.460453	0.552837	none
ERRFI1	5308.45	-0.948932	0.098517	-9.63217	5.84834e-22	4.08078e-21	none
AL034417.2	12.7307	-0.762664	0.132848	-5.74088	9.41876e-09	3.08457e-08	none
AL034417.1	1.69892	-0.00763848	0.148685	-0.0513736	0.959028	0.97003	none
AL358876.1	0.322364	-0.666714	0.363403	-1.83464	0.0665585	0.0997097	none
LINC01714	2.43002	1.06599	0.262696	4.0579	4.95169e-05	0.00011527	up
RNU1-7P	0.0464068	0.0776058	1.99821	0.0388376	0.96902		none
AL358876.2	0.12565	-0.0720823	0.642364	-0.112214	0.910654		none
RNU6-991P	0.0641133	-0.0899786	1.08106	-0.0832319	0.933667		none
SLC45A1	172.808	0.211385	0.105736	1.99917	0.0455897	0.0705518	none
RERE	8762.98	-0.630791	0.0494538	-12.7552	2.91786e-37	3.95833e-36	none
RERE-AS1	14.3011	-0.326593	0.164909	-1.98044	0.047654	0.0734745	none
AL096855.1	2.55699	1.09564	0.264161	4.14762	3.35952e-05	7.96511e-05	up
AL096855.2	3.00718	0.819929	0.251	3.26665	0.00108827	0.00216567	none
RPL7P11	3.47904	0.938976	0.224338	4.18554	2.84494e-05	6.78996e-05	none
RPL7P7	2.59856	1.20045	0.261102	4.59763	4.27329e-06	1.11427e-05	up
AL357552.1	1.29753	1.49578	0.449091	3.33068	0.000866344	0.001744	up
AL357552.2	2.25063	1.41641	0.400785	3.53409	0.000409174	0.000858415	up
RPL23AP19	0.530023	0.443896	0.246677	1.7995	0.0719399	0.107021	none
ENO1	53379.2	0.382224	0.0849316	4.50038	6.7832e-06	1.73186e-05	none
MIR6728	0.54818	0.521899	0.293918	1.77566	0.0757884	0.112172	none
ENO1-AS1	6.49656	-0.268241	0.120181	-2.23197	0.025617	0.0415258	none
RNU6-304P	0.556599	0.671869	0.263732	2.54754	0.0108484	0.0187223	none
HMGN2P17	100.434	0.415283	0.0757877	5.47956	4.26394e-08	1.32463e-07	none
AL139415.1	0.50312	0.168021	0.320078	0.524938	0.599626	0.683862	none
AL139415.2	0.41999	0.127289	0.281783	0.451727	0.651466	0.729206	none
CA6	66.7576	-0.627846	0.379966	-1.65238	0.0984579	0.142452	none
RN7SL451P	0.429136	-0.146034	0.68222	-0.214056	0.830503	0.872221	none
SLC2A7	1.65628	0.124141	0.189954	0.653533	0.513413	0.604432	none
SLC2A5	353.776	-0.10054	0.135021	-0.744626	0.456498	0.548921	none
AL158048.1	0.0703482	0.0195419	1.79356	0.0108956	0.991307		none
GPR157	1401.92	0.396188	0.0793129	4.99526	5.87577e-07	1.65714e-06	none
MIR34AHG	281.645	-0.196021	0.0913397	-2.14606	0.0318681	0.050861	none
MIR34A	0
LNCTAM34A	51.7066	-0.246965	0.0916135	-2.69573	0.00702346	0.0124682	none
H6PD	6583.65	-0.795882	0.0574775	-13.8468	1.3294e-43	2.25832e-42	none
SPSB1	2299.18	-0.0978148	0.0833956	-1.1729	0.240836	0.317033	none
BX323043.1	17.7816	-0.554467	0.103254	-5.36996	7.87557e-08	2.38972e-07	none
LINC02606	80.8561	-0.833134	0.0742007	-11.2281	2.96735e-29	2.89389e-28	none
RNA5SP40	0.231215	-0.126994	0.38191	-0.332525	0.739493	0.801744	none
AL928921.1	2.31645	-2.45108	0.290684	-8.43211	3.39488e-17	1.86665e-16	down
SLC25A33	786.111	-0.417767	0.0776619	-5.3793	7.4774e-08	2.27311e-07	none
AL954705.1	10.5703	-0.939393	0.1115	-8.42505	3.60606e-17	1.98064e-16	none
TMEM201	1181.56	0.300116	0.063293	4.7417	2.1193e-06	5.68487e-06	none
PIK3CD	1133.98	-0.0996156	0.0983274	-1.0131	0.311012	0.396415	none
PIK3CD-AS1	5.65231	1.09608	0.170201	6.4399	1.19554e-10	4.4888e-10	up
AL691449.1	0.234332	0.277691	0.633799	0.438138	0.661286	0.737306	none
PIK3CD-AS2	66.2694	-0.546062	0.135799	-4.0211	5.79263e-05	0.000133991	none
CLSTN1	15173.3	0.19314	0.0551192	3.50404	0.000458262	0.000955983	none
MZT1P1	0.604622	0.869493	0.579344	1.50083	0.133401	0.187487	none
AL357140.3	2.76824	0.821137	0.192703	4.26116	2.03373e-05	4.93306e-05	none
CTNNBIP1	2014.52	0.0183325	0.0696477	0.263218	0.792382	0.843174	none
AL357140.1	0
AL357140.4	4.05489	0.589556	0.213194	2.76534	0.00568629	0.0102377	none
LZIC	3147.98	-0.0235733	0.0404995	-0.582063	0.560524	0.648232	none
AL357140.2	11.6589	0.133673	0.0816078	1.638	0.101423	0.146313	none
NMNAT1	622.758	-0.305567	0.0495944	-6.16133	7.21386e-10	2.56611e-09	none
RN7SKP269	3.85254	0.989182	0.182953	5.40676	6.41748e-08	1.96259e-07	none
TMEM274P	2.85127	0.0663984	0.242495	0.273813	0.784228	0.836668	none
MIR5697	0.572429	0.712895	0.310376	2.29688	0.0216257	0.0354998	none
AL603962.1	0
RBP7	883.504	-2.21597	0.127871	-17.3298	2.80357e-67	1.00139e-65	down
UBE4B	3907.87	-0.318608	0.0489805	-6.5048	7.77983e-11	2.95484e-10	none
AL590639.1	0.93032	0.244041	0.359019	0.679745	0.496666	0.588396	none
PGAM1P11	1.49416	0.280891	0.23147	1.21351	0.224934	0.298404	none
RNU6-828P	1.52375	-0.486338	0.182041	-2.67159	0.00754929	0.0133475	none
KIF1B	4527.71	-0.471023	0.0664671	-7.08656	1.37486e-12	5.87139e-12	none
AL358013.1	0.105899	0.0107374	0.876433	0.0122513	0.990225		none
RNU6-37P	2.91428	-0.370383	0.219599	-1.68663	0.0916745	0.133461	none
RN7SL731P	0
AL139424.3	14.9296	-0.756586	0.103486	-7.311	2.65157e-13	1.1833e-12	none
AL139424.2	32.1511	-0.699116	0.0855113	-8.1757	2.94142e-16	1.54873e-15	none
PGD	8859.65	-0.0421585	0.0694234	-0.607266	0.543674	0.633049	none
AL139424.1	0.302583	0.631002	0.30344	2.07949	0.037572	0.0591646	none
CENPS-CORT	1.54197	-0.112608	0.163912	-0.687003	0.492081	0.583867	none
CENPS	76.4692	1.112	0.080434	13.8249	1.80239e-43	3.04603e-42	up
CORT	7.93371	-0.00391736	0.108936	-0.0359601	0.971314	0.979014	none
DFFA	2654.02	-0.194281	0.0485479	-4.00185	6.28502e-05	0.000144703	none
AL354956.1	0
PEX14	1213.73	-0.0435758	0.0540909	-0.805602	0.420473	0.51209	none
AL139423.2	11.9069	0.0703173	0.15208	0.46237	0.643816	0.722716	none
RN7SL614P	1.8706	0.242058	0.200753	1.20575	0.227914	0.30197	none
CASZ1	2117.73	0.559616	0.0774611	7.22448	5.03025e-13	2.20814e-12	none
AL139423.1	50.2026	0.121628	0.103498	1.17517	0.239927	0.316036	none
HSPE1P24	0.0267636	0.0261479	1.91736	0.0136375	0.989119		none
C1orf127	44.6423	1.61551	0.143035	11.2945	1.39706e-29	1.38422e-28	up
CFL1P6	2.19025	-0.0270806	0.163632	-0.165497	0.868553	0.901648	none
TARDBP	4969.6	0.300006	0.032098	9.34655	9.05521e-21	5.97274e-20	none
AL109811.3	0
MASP2	79.0831	-1.28139	0.113972	-11.243	2.50672e-29	2.45561e-28	down
AL109811.2	33.5248	-1.00085	0.0888548	-11.2639	1.9791e-29	1.94831e-28	down
SRM	3852.4	0.486008	0.08083	6.01272	1.82439e-09	6.29851e-09	none
EXOSC10	2904.52	-0.0881055	0.0363792	-2.42187	0.0154411	0.0260139	none
AL109811.1	8.80969	-1.08315	0.098142	-11.0366	2.54551e-28	2.38331e-27	down
EXOSC10-AS1	23.5203	-0.199458	0.106178	-1.87853	0.0603089	0.091081	none
MTOR	4697.49	-0.094615	0.0469283	-2.01616	0.0437829	0.067987	none
MTOR-AS1	2.76676	-0.401699	0.334244	-1.20181	0.229435	0.303749	none
RNU6-537P	0.241525	-0.0223371	0.840399	-0.0265791	0.978795	0.984518	none
ANGPTL7	79.3702	-4.1062	0.260923	-15.7372	8.40441e-56	2.13404e-54	down
RNU6-291P	0.212411	0.150683	0.512732	0.293883	0.768847	0.82476	none
RPL39P6	0.582516	0.36681	0.289231	1.26823	0.204717	0.274595	none
UBIAD1	1753.88	0.0944435	0.0420495	2.246	0.0247037	0.0401564	none
UBE2V2P3	2.37242	0.0922876	0.172892	0.533787	0.593489	0.67826	none
AL031291.1	1.58383	-4.05435	0.296961	-13.6528	1.94222e-42	3.15802e-41	down
MTCYBP45	0.0524162	-0.0574483	1.3544	-0.0424161	0.966167		none
DISP3	91.6469	2.27297	0.184606	12.3126	7.75254e-35	9.55987e-34	up
AL590989.1	0.0234331	0.0361271	1.97304	0.0183104	0.985391		none
LINC01647	1.47434	2.82073	0.424712	6.64151	3.10488e-11	1.21172e-10	up
AL031731.1	7.57242	-2.29225	0.167471	-13.6874	1.20684e-42	1.97699e-41	down
FBXO2	1013.32	-0.274113	0.159651	-1.71695	0.0859883	0.125898	none
FBXO44	1146.62	0.147744	0.0781563	1.89037	0.0587084	0.088883	none
FBXO6	1052.18	1.02096	0.0717879	14.2218	6.70669e-46	1.23622e-44	up
MAD2L2	1770.54	0.970207	0.0801876	12.0992	1.06621e-33	1.25326e-32	none
DRAXIN	125.672	1.48756	0.149835	9.92804	3.1437e-23	2.3404e-22	up
AGTRAP	3117.06	0.803914	0.0707183	11.3678	6.04644e-30	6.09608e-29	none
C1orf167	21.2026	2.57461	0.262544	9.8064	1.05668e-22	7.6449e-22	up
C1orf167-AS1	0.504459	1.2085	0.46833	2.58046	0.00986697	0.0171405	up
MTHFR	1717.92	0.100562	0.0706024	1.42435	0.154345	0.21376	none
CLCN6	1032.94	-0.972456	0.0502199	-19.3639	1.55534e-83	9.13593e-82	none
AL021155.2	0
AL021155.3	0
NPPA	4.6848	-0.55355	0.127316	-4.34786	1.37472e-05	3.39496e-05	none
AL021155.1	0
NPPB	0.568879	-0.341829	0.361098	-0.946637	0.343824	0.431902	none
SBF1P2	0.474261	-0.573703	0.275288	-2.08401	0.0371594	0.0585491	none
AL021155.4	25.3493	-0.283257	0.0815276	-3.47436	0.000512066	0.00106162	none
RNU5E-1	0
RNU5E-4P	0.855081	0.620309	0.461698	1.34354	0.179098	0.243869	none
KIAA2013	4074.02	0.438206	0.0604552	7.24843	4.2162e-13	1.85807e-12	none
PLOD1	11339.9	0.663201	0.0880685	7.53051	5.05411e-14	2.34335e-13	none
AL096840.2	2.06175	0.798785	0.212735	3.75483	0.000173457	0.000380005	none
MFN2	7274.37	-0.315746	0.0458112	-6.89234	5.48817e-12	2.25829e-11	none
AL096840.1	0.037348	-0.19588	1.40807	-0.139113	0.889361		none
MIIP	1263.64	0.692621	0.0820067	8.4459	3.01718e-17	1.66336e-16	none
MIR6729	0.0071235	-0.00537118	3.56897	-0.00150497	0.998799		none
RN7SL649P	0.140223	0.0819325	0.993377	0.0824788	0.934266		none
TNFRSF8	99.3883	-1.27768	0.124251	-10.2831	8.39861e-25	6.72445e-24	down
RNU6-777P	0.0271927	-0.0993234	2.21089	-0.0449246	0.964167		none
RPL23AP89	0.260152	0.0343237	0.335863	0.102195	0.918602	0.940741	none
AL357835.1	0.131686	0.249885	0.686698	0.363894	0.715937		none
MIR7846	0.00650751	-0.0157673	4.99129	-0.00315896	0.99748		none
TNFRSF1B	2588.88	-0.74629	0.0951973	-7.8394	4.52687e-15	2.23685e-14	none
MIR4632	0.0792392	-0.0536837	0.902241	-0.0595004	0.952554		none
RPL10P17	0.275429	-0.452905	0.314821	-1.43861	0.15026	0.208799	none
SNORA70	0.0223227	0.0305421	2.88948	0.0105701	0.991566		none
VPS13D	5932.56	-0.584773	0.061867	-9.4521	3.3209e-21	2.23276e-20	none
SNORA59A	4.9507	0.140041	0.0999529	1.40107	0.161193	0.222097	none
LINC02766	2.42611	-2.37308	0.160081	-14.8243	1.02064e-49	2.15252e-48	down
DHRS3	3286.41	-1.14333	0.088433	-12.9288	3.09673e-38	4.35001e-37	down
RNU6ATAC18P	2.95829	-2.09855	0.150479	-13.9458	3.33847e-44	5.80649e-43	down
MIR6730	0.821895	-0.833931	0.219294	-3.8028	0.000143071	0.000316561	none
AC254633.1	19.747	-2.40583	0.124469	-19.3288	3.07364e-83	1.78941e-81	down
AADACL4	0.25988	-1.90333	0.426773	-4.45981	8.20327e-06	2.07631e-05	down
AC244670.1	0.0287055	0.0490909	1.77368	0.0276774	0.977919		none
AADACL3	2.42237	-3.12767	0.455399	-6.86797	6.51228e-12	2.66419e-11	down
C1orf158	7.87553	2.21502	0.328172	6.74958	1.48276e-11	5.9174e-11	up
PRAMEF12	0.478267	1.18827	0.63279	1.87783	0.0604047	0.0912137	none
PRAMEF1	0.185682	0.505866	0.921753	0.548809	0.583137	0.668742	none
LINC01784	0.0142848	0.0357219	3.25237	0.0109834	0.991237		none
PRAMEF11	0.0577697	0.0732042	1.60806	0.0455234	0.96369		none
PRAMEF30P	0.0865753	-0.0947742	1.26866	-0.0747042	0.94045		none
HNRNPCL1	0.976547	0.778358	0.208171	3.73902	0.000184736	0.000403504	none
PRAMEF2	0.179796	0.383401	0.878772	0.436292	0.662625	0.73835	none
PRAMEF4	0.0528163	-0.00638366	1.9439	-0.00328394	0.99738		none
PRAMEF10	0.0370427	0.00579904	1.85499	0.00312618	0.997506		none
PRAMEF7	0.116797	0.308728	1.37604	0.224359	0.822478		none
RNU6-1072P	0.00183198	0.00198879	4.99129	0.000398453	0.999682		none
PRAMEF29P	0.00465341	-0.05167	4.99129	-0.010352	0.99174		none
PRAMEF6	0.0410089	0.108322	2.26204	0.0478871	0.961806		none
PRAMEF28P	0.0525324	0.0883656	1.99999	0.0441829	0.964759		none
PRAMEF27	0.0274523	0.0131786	2.63981	0.00499224	0.996017		none
HNRNPCL3	0.13959	0.148515	0.571285	0.259966	0.79489		none
PRAMEF25	0.00457767	-0.0438929	4.99129	-0.0087939	0.992984		none
PRAMEF34P	0.0126757	0.0101936	2.83261	0.00359867	0.997129		none
PRAMEF35P	0.0258727	-0.0279128	2.87555	-0.00970697	0.992255		none
HNRNPCL2	0.514953	0.446036	0.248308	1.7963	0.0724466	0.107712	none
PRAMEF36P	0.0161106	-0.0127558	3.41449	-0.00373578	0.997019		none
AC245056.1	0.00245018	0.00458117	4.99129	0.000917834	0.999268		none
PRAMEF26	0.00319348	-0.0261368	4.99129	-0.00523649	0.995822		none
HNRNPCL4	0.0743101	0.112485	0.819388	0.137279	0.89081		none
PRAMEF9	0.0214874	-0.00756392	2.89753	-0.00261047	0.997917		none
PRAMEF13	0.0459045	0.142025	2.19101	0.0648216	0.948316		none
PRAMEF18	0.106653	-0.237477	0.951721	-0.249524	0.802956		none
PRAMEF31P	0.0719433	0.127645	1.683	0.0758438	0.939543		none
PRAMEF5	0.0260897	0.0590619	2.642	0.022355	0.982165		none
PRAMEF32P	0.0104976	0.0175583	4.25302	0.00412842	0.996706		none
RNU6-771P	0.00310026	0.00458117	4.99129	0.000917834	0.999268		none
PRAMEF8	0.109667	0.256881	1.10582	0.232299	0.816306		none
PRAMEF33	0.0224813	0.0179684	3.02767	0.00593473	0.995265		none
PRAMEF15	0.0398101	0.00359493	2.067	0.0017392	0.998612		none
AC243961.1	0.0123701	0.030505	4.99129	0.00611164	0.995124		none
PRAMEF14	0.115842	0.264658	1.15437	0.229266	0.818662		none
PRAMEF19	0.0637593	0.0299136	1.5124	0.0197789	0.98422		none
PRAMEF17	0.100563	-0.116935	0.948428	-0.123293	0.901875		none
PRAMEF20	0.116051	0.231737	0.992764	0.233426	0.815431		none
LRRC38	5.75353	-3.76134	0.227135	-16.5599	1.35744e-61	4.02534e-60	down
AL354712.1	0.0365588	-0.272878	2.19571	-0.124278	0.901095		none
BRWD1P1	0.0591155	-0.0670363	1.0009	-0.0669764	0.946601		none
PDPN	1446.35	-0.422117	0.105895	-3.9862	6.71409e-05	0.000154002	none
RNA5SP41	0.0408415	-0.177732	1.25079	-0.142096	0.887004		none
AL359771.1	0.288646	-1.21634	0.397834	-3.05742	0.00223254	0.0042582	down
AL359771.2	0.290804	-0.337565	0.324907	-1.03896	0.298824	0.38274	none
PRDM2	3711.97	-0.399031	0.0512568	-7.78493	6.97526e-15	3.41325e-14	none
KAZN	1691.68	-0.147727	0.0778744	-1.89699	0.0578295	0.0876449	none
RNU6-1265P	0.102888	0.0636158	1.42411	0.0446707	0.96437		none
AL357873.1	7.19348	-0.589733	0.207707	-2.83926	0.00452181	0.00825469	none
KAZN-AS1	22.3694	0.699665	0.242267	2.88799	0.00387714	0.00714858	none
TBCAP2	1.10079	1.26162	0.478884	2.6345	0.00842602	0.0147946	up
AL031293.1	1.68606	1.35323	0.37202	3.63751	0.000275285	0.000589563	up
TMEM51-AS1	91.5058	-0.238577	0.107945	-2.21017	0.0270932	0.0437327	none
TMEM51	962.429	0.717464	0.0715465	10.0279	1.14888e-23	8.73434e-23	none
C1orf195	2.88283	1.24548	0.280733	4.43652	9.14229e-06	2.30332e-05	up
MFFP1	2.16461	1.45959	0.367078	3.97625	7.00103e-05	0.000160144	up
ZBTB2P1	1.80803	1.02671	0.18925	5.42517	5.79008e-08	1.77687e-07	up
FHAD1	171.212	0.935641	0.0885615	10.5649	4.33598e-26	3.67538e-25	none
FHAD1-AS1	0.494385	-1.19658	0.241226	-4.96038	7.03539e-07	1.97051e-06	down
AL031283.2	6.93735	0.0232482	0.120074	0.193616	0.846476	0.884475	none
AL031283.1	6.75083	0.797299	0.137358	5.80452	6.45503e-09	2.14176e-08	none
EFHD2	3345.8	0.694284	0.0796474	8.71696	2.85761e-18	1.65902e-17	none
CTRC	3.95898	0.0673654	0.152933	0.440489	0.659583	0.73605	none
CELA2A	1.52571	-0.132163	0.170407	-0.775572	0.438002	0.529996	none
CELA2B	5.67114	-0.359731	0.128027	-2.80981	0.0049571	0.00899216	none
CASP9	863.436	0.0234061	0.0450864	0.519139	0.603664	0.687409	none
DNAJC16	2205.02	0.13401	0.0517759	2.58828	0.00964565	0.0167833	none
SCARNA21B	0.398375	0.831633	0.715393	1.16249	0.245038	0.321929	none
AL121992.3	1.32667	0.862687	0.219419	3.93169	8.43504e-05	0.000191345	none
AGMAT	154.867	1.49835	0.0927625	16.1525	1.09067e-58	2.99633e-57	up
AL121992.1	9.35412	0.357274	0.120854	2.95624	0.00311415	0.00581626	none
CHCHD2P6	25.6608	0.0153117	0.0781492	0.195929	0.844666	0.883057	none
RNU7-179P	0.0541944	-0.0111729	1.03778	-0.0107661	0.99141		none
CD24P1	0.140508	-0.01761	0.555668	-0.0316916	0.974718		none
DDI2	4322.42	-0.0940989	0.0559247	-1.6826	0.0924528	0.13445	none
RSC1A1	0
AL121992.2	0.759103	0.725921	0.284512	2.55146	0.0107272	0.0185284	none
PLEKHM2	3516.69	-0.134062	0.0483959	-2.77011	0.00560366	0.0100964	none
AL450998.2	16.9528	0.0219168	0.122602	0.178763	0.858123	0.893426	none
SLC25A34	54.3462	-1.1732	0.10065	-11.6563	2.1305e-31	2.27165e-30	down
SLC25A34-AS1	0.669109	0.574307	0.272739	2.1057	0.0352303	0.0557474	none
TMEM82	6.9367	3.64132	0.342784	10.6228	2.33425e-26	2.00152e-25	up
FBLIM1	3897.72	0.294532	0.087564	3.36362	0.000769276	0.00156015	none
RPL12P14	6.11127	-1.07386	0.105689	-10.1605	2.97403e-24	2.32092e-23	down
UQCRHL	117.294	0.266837	0.0767545	3.47651	0.00050799	0.00105369	none
AL450998.1	39.0072	0.136862	0.147422	0.928365	0.353218	0.441814	none
FLJ37453	236.281	-0.0262138	0.0774681	-0.338382	0.735075	0.798112	none
SPEN	6269.7	-0.495491	0.0526383	-9.41311	4.81655e-21	3.21341e-20	none
AL034555.1	1.11437	1.38996	0.499154	2.78464	0.00535871	0.00967864	up
ZBTB17	1371.99	0.356158	0.0586041	6.07735	1.22185e-09	4.27714e-09	none
AL355994.4	0.945556	0.575959	0.397913	1.44745	0.147771	0.205632	none
AL355994.1	0.0215233	0.023161	2.37803	0.00973958	0.992229		none
AL355994.5	0.0190226	-0.112288	2.47565	-0.045357	0.963823		none
TBC1D3P6	0.0866309	0.17211	1.06526	0.161566	0.871647		none
SRARP	494.32	1.15205	0.23957	4.80884	1.51809e-06	4.13056e-06	up
AL355994.3	0
HSPB7	973.049	-5.15536	0.159949	-32.2313	6.43666e-228	1.47831e-224	down
CLCNKA	49.496	-0.176234	0.139914	-1.25959	0.207818	0.278169	none
AL355994.2	2.42964	1.11918	0.267802	4.17913	2.92626e-05	6.97825e-05	up
CLCNKB	16.1827	-1.05496	0.149811	-7.04198	1.89525e-12	8.02659e-12	down
FAM131C	28.703	1.19275	0.200544	5.94756	2.72169e-09	9.27642e-09	up
EPHA2	1094.74	-1.09214	0.0930593	-11.7359	8.34062e-32	9.01666e-31	down
AL451042.2	6.62729	-1.25476	0.127575	-9.83541	7.92429e-23	5.7731e-22	down
AL451042.1	3.07286	-1.47028	0.151001	-9.73689	2.09886e-22	1.49471e-21	down
ARHGEF19-AS1	0
ARHGEF19	1487.56	0.913664	0.0878462	10.4007	2.46054e-25	2.01826e-24	none
ANO7L1	93.8768	0.605177	0.0803996	7.52711	5.18747e-14	2.40397e-13	none
AL109627.1	458.803	0.400586	0.0600231	6.67385	2.49173e-11	9.78833e-11	none
CPLANE2	209.7	0.383191	0.0688382	5.56655	2.59833e-08	8.2198e-08	none
MT1XP1	5.84514	-0.646951	0.144471	-4.47806	7.53227e-06	1.91492e-05	none
FBXO42	1926.27	-0.193164	0.0305501	-6.32284	2.56791e-10	9.43635e-10	none
SZRD1	5387.95	0.150907	0.0396862	3.80251	0.000143236	0.000316882	none
RPL22P3	5.87562	-0.244761	0.126336	-1.93738	0.0526992	0.080475	none
SPATA21	2.83252	-0.181619	0.222685	-0.815587	0.414737	0.506312	none
NECAP2	3753.7	0.0196806	0.0426234	0.461733	0.644272	0.723057	none
LINC01772	69.8006	-0.46391	0.0806915	-5.74919	8.96735e-09	2.94156e-08	none
CROCCP3	176.705	-0.303332	0.0827215	-3.66691	0.000245502	0.000528911	none
RNU1-1	0.475619	0.525589	0.68814	0.763782	0.444997	0.53706	none
AL137802.2	3.18434	0.197429	0.160201	1.23239	0.217804	0.289921	none
AL137802.3	0.297874	0.329642	0.367278	0.897526	0.369439	0.458864	none
AL137802.1	0.00792134	0.0175623	4.03341	0.00435422	0.996526		none
LINC01783	6.43709	0.0191257	0.223836	0.0854452	0.931907	0.950468	none
RNU1-6P	0.00230998	0.00198879	4.99129	0.000398453	0.999682		none
AL355149.1	0.14912	0.028702	0.593502	0.0483605	0.961429		none
NBPF1	1247.15	-0.0974663	0.0874398	-1.11467	0.264993	0.344655	none
AL137798.1	3.96227	0.916678	0.209171	4.38244	1.17358e-05	2.91832e-05	none
CROCCP2	945.346	-0.154932	0.0793123	-1.95345	0.0507668	0.0778293	none
AL137798.3	0
MST1P2	99.7313	-0.548516	0.129501	-4.23562	2.27922e-05	5.50121e-05	none
AL137798.2	0.158013	0.459416	0.528223	0.869738	0.384444		none
RNU1-3	0.245698	0.336453	2.49654	0.134768	0.892795	0.920386	none
AL021920.2	3.08101	1.87592	0.306789	6.11469	9.67478e-10	3.41217e-09	up
EIF1AXP1	14.4798	0.340119	0.0923699	3.68214	0.000231286	0.000499971	none
ESPNP	11.6934	1.81111	0.20766	8.7215	2.7454e-18	1.59609e-17	up
AL021920.1	0.25937	0.309034	0.436615	0.707796	0.479072	0.571354	none
AL021920.3	0.0601804	0.112095	0.954581	0.117428	0.906521		none
CROCC	1422.32	0.208018	0.0884005	2.35314	0.0186157	0.0309156	none
CROCCP4	0.0486336	-0.0544643	1.05394	-0.0516768	0.958786		none
RNU1-4	0.109851	0.129846	1.86873	0.0694832	0.944605		none
MST1L	34.8807	-0.789431	0.149614	-5.27647	1.31699e-07	3.92569e-07	none
BX284668.1	0.079091	0.166145	1.16279	0.142884	0.886382		none
BX284668.3	0.398976	-0.138132	0.462939	-0.29838	0.765413	0.822056	none
MIR3675	0.0052845	0.00458117	4.99129	0.000917834	0.999268		none
BX284668.2	17.6373	0.691354	0.209852	3.29448	0.000986048	0.00197047	none
RNU1-5P	0
BX284668.5	35.7629	-0.397272	0.123041	-3.22878	0.0012432	0.00245561	none
BX284668.4	0
RNU1-2	0.8877	0.993349	0.629564	1.57784	0.114603	0.163463	none
BX284668.6	3.55673	0.656493	0.156734	4.18859	2.80694e-05	6.70588e-05	none
MFAP2	1612.73	2.35104	0.112789	20.8447	1.70228e-96	1.38886e-94	up
AL049569.2	0.108015	0.136988	0.682609	0.200683	0.840947		none
AL049569.1	1.94695	1.318	0.225263	5.85096	4.88741e-09	1.63581e-08	up
ATP13A2	4207.15	0.953594	0.06908	13.8042	2.40442e-43	4.04262e-42	none
AL049569.3	0
SDHB	3721.95	0.0031401	0.048833	0.0643028	0.948729	0.962411	none
PADI2	5989.01	-0.465106	0.177785	-2.61612	0.0088935	0.015553	none
LINC02783	1.43366	1.1858	0.327948	3.61582	0.000299397	0.000638583	up
AL590644.2	0.0300959	0.0339219	2.28053	0.0148746	0.988132		none
PADI1	9.14318	1.8132	0.242154	7.4878	7.00387e-14	3.22199e-13	up
PADI3	91.5553	2.11693	0.258472	8.19019	2.60817e-16	1.37674e-15	up
MIR3972	0.235088	0.477154	0.756593	0.630661	0.528262	0.618395	none
PADI4	10.6177	-0.766429	0.215621	-3.55452	0.000378669	0.000798172	none
PADI6	2.10949	2.20344	0.262042	8.40873	4.14484e-17	2.26924e-16	up
RCC2-AS1	0
RCC2	10163.6	1.00629	0.0545074	18.4616	4.20772e-76	1.98845e-74	up
ARHGEF10L	2857.76	-0.0900954	0.0657961	-1.36931	0.170902	0.234063	none
LINC02810	0.18095	0.226573	0.543841	0.416616	0.676959	0.750826	none
ACTL8	154.672	7.00353	0.340381	20.5755	4.54719e-94	3.52227e-92	up
AL357509.1	0.101823	0.0795616	1.23297	0.0645284	0.948549		none
LINC01654	0.128269	-0.0477198	1.16496	-0.0409626	0.967326		none
IGSF21	697.026	0.920212	0.178278	5.16166	2.44772e-07	7.13412e-07	none
AL365209.1	13.627	1.22025	0.217342	5.61443	1.97214e-08	6.29348e-08	up
IGSF21-AS1	0.36137	0.449402	0.618365	0.726758	0.467374	0.559669	none
AL591896.1	0.0849061	-0.117325	0.93569	-0.125388	0.900216		none
KLHDC7A	1399.23	0.876334	0.242081	3.62	0.000294601	0.000628733	none
DYNLL1P3	0.14875	0.225956	0.442966	0.510098	0.609983		none
AL031737.1	0.579955	1.53253	0.390444	3.92511	8.66913e-05	0.000196403	up
PAX7	116.405	6.86714	0.412844	16.6337	3.97112e-62	1.20006e-60	up
TAS1R2	0.377018	0.850994	0.349673	2.43368	0.014946	0.0252327	none
ALDH4A1	2707.43	-0.912389	0.0992505	-9.19279	3.82766e-20	2.43855e-19	none
MIR4695	0.00476895	0.01236	4.91428	0.00251512	0.997993		none
MIR1290	0.205619	-0.669254	0.508882	-1.31515	0.18846	0.255143	none
IFFO2	2272.8	-1.48471	0.100719	-14.7412	3.50542e-49	7.26944e-48	down
AL137127.1	23.3346	-0.378471	0.0796634	-4.75087	2.02544e-06	5.44584e-06	none
UBR4	10289.3	-0.240806	0.0607241	-3.96558	7.32182e-05	0.000167174	none
EMC1-AS1	12.5371	-0.372826	0.0832915	-4.47616	7.59972e-06	1.9311e-05	none
EMC1	4423.65	0.114902	0.0461044	2.49222	0.0126946	0.0216812	none
MRTO4	2686.36	0.480911	0.058284	8.25116	1.56867e-16	8.35907e-16	none
AL035413.2	33.6315	0.512352	0.0987903	5.18625	2.14567e-07	6.28406e-07	none
AKR7L	105.595	1.36948	0.131043	10.4506	1.45529e-25	1.20467e-24	up
AKR7A3	1515.09	2.61152	0.195705	13.3442	1.2806e-40	1.95037e-39	up
AL035413.1	100.394	-0.0532763	0.0955162	-0.557772	0.577	0.663427	none
AKR7A2	3189.4	0.309186	0.0645431	4.79038	1.66465e-06	4.51217e-06	none
RNU6-1099P	3.62626	0.671072	0.159848	4.19819	2.69051e-05	6.44012e-05	none
SLC66A1	967.219	0.745396	0.0596959	12.4866	8.83923e-36	1.12565e-34	none
CAPZB	14952.5	0.41152	0.0442261	9.30491	1.34112e-20	8.76534e-20	none
RN7SL277P	1.56255	1.40194	0.35373	3.9633	7.39223e-05	0.000168664	up
MICOS10	516.919	-0.270205	0.0694396	-3.89123	9.97377e-05	0.000224631	none
RNU4-28P	0.186158	0.346458	0.697379	0.4968	0.61933	0.701406	none
AL031727.2	0.620409	0.150164	0.251061	0.598118	0.549761	0.638566	none
NBL1	9492.17	0.479662	0.111586	4.2986	1.71879e-05	4.20443e-05	none
MICOS10-NBL1	0.146307	-0.385707	0.62888	-0.613323	0.539663		none
AL031727.1	48.7038	0.458456	0.0986156	4.64892	3.33685e-06	8.79123e-06	none
HTR6	24.8961	1.49441	0.196198	7.61684	2.59952e-14	1.22859e-13	up
TMCO4	1823.16	-0.320211	0.0632856	-5.05978	4.19744e-07	1.19919e-06	none
RNF186	10.7503	-3.05891	0.286915	-10.6614	1.54266e-26	1.33422e-25	down
AL391883.1	1.09805	-4.16615	0.275787	-15.1064	1.46933e-51	3.2907e-50	down
OTUD3	829.891	-0.656713	0.0634624	-10.3481	4.27016e-25	3.46485e-24	none
PLA2G2E	0.139113	-0.0361781	0.64207	-0.0563461	0.955066		none
RN7SL304P	0.101804	-0.0399411	0.786392	-0.0507903	0.959493		none
PLA2G2A	1345.79	-1.40547	0.262876	-5.34652	8.96632e-08	2.71067e-07	down
PLA2G5	75.9611	-1.33497	0.134375	-9.9346	2.94356e-23	2.19318e-22	down
PLA2G2D	322.213	1.75861	0.224855	7.82112	5.23553e-15	2.57759e-14	up
PLA2G2F	4.79405	2.55099	0.303813	8.39656	4.59734e-17	2.51039e-16	up
Z98257.1	27.0696	2.43159	0.222952	10.9063	1.07512e-27	9.79658e-27	up
PLA2G2C	86.076	1.22073	0.153419	7.95688	1.76437e-15	8.92167e-15	up
UBXN10	1210.88	0.585632	0.141899	4.12711	3.67357e-05	8.67299e-05	none
LINC01757	0.05719	0.139439	1.37659	0.101293	0.919318		none
Z98257.2	0.125128	0.293176	0.878041	0.333898	0.738457		none
VWA5B1	6.41806	-0.258513	0.208454	-1.24015	0.214921	0.286466	none
AL020998.1	0.253497	0.16297	0.380341	0.428485	0.668298	0.743248	none
LINC01141	7.11488	0.623768	0.130709	4.7722	1.82229e-06	4.92151e-06	none
AL139254.1	0.0528122	-0.00418221	2.04918	-0.00204092	0.998372		none
AL139254.2	0.170133	0.281791	0.674375	0.417855	0.676053	0.749984	none
AL139254.3	0.0513323	-0.0189513	1.26872	-0.0149373	0.988082		none
CAMK2N1	4463.5	0.570211	0.113882	5.00704	5.52745e-07	1.56264e-06	none
MUL1	2172.52	-0.110155	0.0415643	-2.65022	0.00804389	0.0141664	none
RPS4XP4	0.453889	0.52602	0.286029	1.83904	0.0659092	0.0988078	none
FAM43B	60.8595	-0.0853804	0.128071	-0.666663	0.504987	0.596592	none
CDA	113.295	0.113195	0.108719	1.04117	0.297796	0.381635	none
PINK1	855.977	-0.869814	0.0634142	-13.7164	8.10104e-43	1.3347e-41	none
MIR6084	0
PINK1-AS	227.657	-0.181718	0.059723	-3.04269	0.00234475	0.00446007	none
DDOST	12539.7	0.479612	0.0501254	9.56824	1.08746e-21	7.47663e-21	none
KIF17	96.9447	-1.04653	0.0866968	-12.0711	1.50099e-33	1.75481e-32	down
AL663074.2	0.117394	-0.032164	0.870428	-0.0369519	0.970523		none
SH2D5	13.4366	1.73227	0.182475	9.49319	2.24069e-21	1.51649e-20	up
AL663074.1	0.118512	0.108861	0.699518	0.155622	0.876331		none
HP1BP3	10709.8	-0.274264	0.0475473	-5.76825	8.01005e-09	2.63827e-08	none
EIF4G3	5505.71	0.103516	0.0531666	1.94701	0.0515335	0.0788667	none
RNU7-200P	0.126023	0.175094	0.881876	0.198547	0.842617		none
MIR1256	0.43305	0.644534	0.770138	0.836907	0.402645	0.493768	none
RPS15AP6	3.72338	1.06808	0.274603	3.88954	0.000100434	0.00022611	up
AL627311.1	0.875214	1.40528	0.548279	2.56308	0.0103749	0.0179678	up
HSPE1P27	1.91405	1.27442	0.395104	3.22553	0.00125738	0.0024818	up
AL031005.2	2.09432	0.405721	0.154687	2.62285	0.00871984	0.0152725	none
ECE1	16245.8	-0.422601	0.0699705	-6.03971	1.54394e-09	5.3609e-09	none
AL031005.1	3.57612	0.564318	0.247231	2.28255	0.0224568	0.0367682	none
ECE1-AS1	16.9232	0.048636	0.126278	0.385151	0.700125	0.769925	none
PPP1R11P1	0.479436	0.0223356	0.31089	0.0718441	0.942726	0.958162	none
AL592309.1	0.0909077	0.0618063	0.848093	0.0728768	0.941904		none
AL592309.2	0.0897942	0.112874	1.04445	0.10807	0.91394		none
NBPF2P	37.5449	-0.373652	0.100952	-3.7013	0.000214498	0.000465367	none
HS6ST1P1	29.1069	0.969201	0.149859	6.4674	9.9705e-11	3.7623e-10	none
CROCCP5	1.45796	0.351836	0.191951	1.83294	0.0668113	0.100043	none
NBPF3	672.946	-0.394453	0.0765368	-5.15377	2.55306e-07	7.43076e-07	none
PFN1P10	0.0208162	0.0387194	1.97948	0.0195604	0.984394		none
ALPL	1519.65	-1.19025	0.14758	-8.06513	7.31558e-16	3.77439e-15	down
LINC02596	0.364013	0.0629043	0.37051	0.169778	0.865185	0.899086	none
RAP1GAP	1804.99	0.880963	0.112779	7.81143	5.65425e-15	2.77837e-14	none
USP48	3754.64	-0.113003	0.0394159	-2.86695	0.00414451	0.00760947	none
AL590103.1	0.733659	1.01122	0.591952	1.70828	0.0875853	0.128032	none
LDLRAD2	48.6478	-2.68156	0.110132	-24.3485	6.01011e-131	1.07839e-128	down
HSPG2	18125.7	-0.913224	0.100295	-9.10539	8.59557e-20	5.37182e-19	none
AL590556.1	8.18429	-0.729102	0.107704	-6.76947	1.29255e-11	5.17945e-11	none
AL590556.2	1.5762	1.55006	0.268082	5.78202	7.38083e-09	2.43767e-08	up
CELA3B	0.162599	-0.0432915	0.661979	-0.0653971	0.947858	0.961761	none
AL590556.3	0.0147115	-0.0971304	3.0886	-0.031448	0.974912		none
RN7SL386P	0.0748094	0.0458555	1.89225	0.0242334	0.980666		none
RNU6-1022P	0.00931346	-0.15121	4.99129	-0.0302949	0.975832		none
CELA3A	0.0852908	0.0614138	1.36013	0.0451529	0.963985		none
RN7SL186P	0.0652967	0.0376907	1.54345	0.0244197	0.980518		none
RNU6-776P	0.00631166	0.00976593	4.99129	0.0019566	0.998439		none
LINC01635	1.7601	-0.734734	0.170339	-4.31336	1.60793e-05	3.94459e-05	none
LINC00339	60.3552	-0.148174	0.0903194	-1.64056	0.100888	0.145611	none
CDC42	15990	0.20533	0.0391785	5.2409	1.59798e-07	4.73252e-07	none
CDC42-AS1	26.3524	0.11394	0.0861443	1.32267	0.185945	0.252139	none
AL031281.1	0
CDC42-IT1	4.32022	0.756967	0.219725	3.44507	0.000570911	0.00117698	none
MPHOSPH6P1	3.76344	0.312587	0.223627	1.3978	0.162172	0.223325	none
WNT4	658.869	0.369994	0.147848	2.50254	0.0123305	0.0211016	none
AL445253.1	41.5838	0.357261	0.135766	2.63145	0.00850213	0.0149197	none
MIR4418	0.0236428	-0.0508469	2.15119	-0.0236366	0.981142		none
PPIAP34	2.81017	0.265704	0.156169	1.70138	0.0888715	0.129755	none
AL591122.1	0.0887088	0.181309	1.19343	0.151923	0.879248		none
ZBTB40	2342.65	-0.211289	0.0541897	-3.89907	9.65641e-05	0.000217783	none
ZBTB40-IT1	5.20012	-0.337375	0.135039	-2.49836	0.0124771	0.0213342	none
EPHA8	68.9823	3.60787	0.25258	14.284	2.75147e-46	5.13138e-45	up
MIR6127	0.0295071	-0.055638	1.69275	-0.0328684	0.97378		none
C1QA	6123.71	-0.0965222	0.115829	-0.833316	0.404667	0.495838	none
C1QC	6362.41	0.148856	0.105257	1.41421	0.1573	0.217418	none
C1QB	7168.74	0.00617762	0.113578	0.0543909	0.956624	0.968217	none
EPHB2	809.86	1.0343	0.101107	10.2297	1.4593e-24	1.15731e-23	up
MIR4684	0.131722	0.224988	1.5619	0.144047	0.885463		none
AL512444.1	0.385242	0.63232	0.677376	0.933485	0.35057	0.439039	none
MIR4253	0.0181625	-0.0205327	3.39099	-0.00605506	0.995169		none
LACTBL1	0.164485	0.0131187	0.644396	0.0203581	0.983758	0.98806	none
TEX46	2.29182	0.187376	0.172023	1.08925	0.276044	0.357227	none
KDM1A	6274.73	0.439336	0.0480345	9.14626	5.89374e-20	3.71719e-19	none
AL031428.1	0.925039	1.44931	0.509425	2.845	0.00444113	0.00811645	up
MIR3115	0.111933	0.0466407	1.08534	0.0429733	0.965723		none
AL031428.2	0.403384	0.321565	0.467438	0.687931	0.491496	0.583324	none
LUZP1	2538.45	-0.699337	0.0574729	-12.1681	4.59607e-34	5.49422e-33	none
AL161672.1	1.15146	0.933958	0.397239	2.35113	0.0187166	0.0310663	none
RNU6-514P	0.273119	-0.23286	0.65678	-0.354548	0.722928	0.788423	none
RNU6-135P	0.455308	0.21264	0.605825	0.350992	0.725594	0.790584	none
HTR1D	70.4541	3.64721	0.179211	20.3515	4.5024e-92	3.33032e-90	up
AL109936.1	1.33568	0.0953617	0.179301	0.531852	0.594828	0.679436	none
LINC01355	477.101	0.312366	0.0903333	3.45792	0.000544358	0.00112491	none
AL109936.9	19.3172	-0.0215187	0.114814	-0.187423	0.851329	0.887941	none
HNRNPR	9596.48	0.261585	0.0338109	7.7367	1.02033e-14	4.94753e-14	none
ZNF436	2693.32	-0.502557	0.0577657	-8.69993	3.32089e-18	1.92046e-17	none
ZNF436-AS1	106.102	-0.756888	0.0912603	-8.29372	1.09756e-16	5.88828e-16	none
AL109936.2	39.4467	0.926049	0.123051	7.52575	5.24174e-14	2.42814e-13	none
TCEA3	4182.83	0.798199	0.0940998	8.48247	2.20467e-17	1.22335e-16	none
AL357134.1	2.60749	1.78404	0.26123	6.82938	8.52844e-12	3.46279e-11	up
ASAP3	2973.5	0.0192296	0.0653321	0.294336	0.768501	0.824623	none
E2F2	613.547	2.58581	0.122591	21.0929	9.2493e-99	8.07713e-97	up
AL021154.1	7.43223	1.37565	0.158845	8.66032	4.70424e-18	2.70106e-17	up
ID3	2173.51	-0.473462	0.0923773	-5.1253	2.97058e-07	8.59693e-07	none
AL450043.1	1.53218	0.814293	0.20019	4.0676	4.74997e-05	0.000110799	none
MDS2	5.7212	1.13276	0.180966	6.25949	3.86238e-10	1.4006e-09	up
AL451000.1	0.179856	0.274934	0.608391	0.451904	0.651338	0.729127	none
RPL11	43403.2	-0.505215	0.0669757	-7.54326	4.58382e-14	2.13046e-13	none
ELOA-AS1	40.0873	0.012898	0.0784702	0.164369	0.869441	0.902284	none
ELOA	3336.85	-0.0797449	0.0407123	-1.95874	0.0501431	0.0769734	none
PITHD1	2801.86	0.00753435	0.0460476	0.163621	0.87003	0.902773	none
LYPLA2	3920.44	0.918662	0.0614731	14.9441	1.70087e-50	3.68179e-49	none
GALE	2237.65	1.61959	0.0874346	18.5234	1.33747e-76	6.46007e-75	up
HMGCL	2453.03	0.103798	0.0608306	1.70635	0.0879435	0.128502	none
FUCA1	3410.2	0.156737	0.0695735	2.25282	0.0242702	0.0395091	none
CNR2	35.1547	1.62915	0.205358	7.93323	2.13518e-15	1.07529e-14	up
BTBD6P1	2.43038	0.66998	0.212822	3.14807	0.0016435	0.00319451	none
AL590609.2	0.156695	0.22563	0.526489	0.428556	0.668247		none
MIR378F	0.0120013	-0.0179364	3.11751	-0.00575345	0.995409		none
H3P1	2.01892	1.34296	0.184079	7.29557	2.97397e-13	1.32242e-12	up
PNRC2	5192.35	-0.0363938	0.0470655	-0.773258	0.43937	0.531357	none
SRSF10	6300.29	0.07613	0.0340136	2.23822	0.0252065	0.0409086	none
AL590609.1	0.107588	0.0344601	0.673699	0.0511505	0.959206		none
AL591178.1	1.50814	0.0872572	0.202937	0.429971	0.667217	0.742333	none
MYOM3	98.3812	-1.26381	0.118697	-10.6474	1.79377e-26	1.54733e-25	down
MYOM3-AS1	0.0870547	-0.608415	0.847119	-0.718217	0.472624		none
IL22RA1	69.7067	-0.948672	0.15087	-6.28801	3.21564e-10	1.1733e-09	none
IFNLR1	401.824	-0.664487	0.0956208	-6.94918	3.67411e-12	1.52952e-11	none
LINC02800	1.03983	-0.109969	0.241991	-0.454434	0.649516	0.727556	none
GRHL3-AS1	4.17019	0.0232658	0.168842	0.137796	0.890401	0.918393	none
GRHL3	264.251	1.21782	0.139932	8.70296	3.23338e-18	1.87103e-17	up
STPG1	673.867	-0.0369481	0.0499841	-0.739197	0.459788	0.552197	none
NIPAL3	2894.23	-0.254682	0.0736767	-3.45675	0.000546735	0.00112952	none
RCAN3AS	8.7811	0.783783	0.123646	6.33894	2.31346e-10	8.52726e-10	none
RCAN3	2012.24	0.216352	0.0683244	3.16655	0.0015426	0.00300738	none
NCMAP-DT	1.33707	-0.684159	0.287045	-2.38345	0.017151	0.0286467	none
NCMAP	357.404	-0.847762	0.211749	-4.00361	6.23825e-05	0.000143698	none
AL445686.1	1.03561	-0.791117	0.368052	-2.14947	0.0315972	0.050469	none
SRRM1	5386.33	-0.165569	0.040948	-4.0434	5.2682e-05	0.000122272	none
AL445648.1	0.698204	-1.75716	0.256822	-6.84197	7.8114e-12	3.17924e-11	down
CLIC4	14392.4	-0.396167	0.0724591	-5.46745	4.56553e-08	1.41421e-07	none
RNU6-1208P	0.34043	0.355181	0.734303	0.483698	0.6286	0.709508	none
RUNX3	1188.92	0.0673139	0.12807	0.525601	0.599165	0.683421	none
MIR6731	0.126522	0.152542	0.814768	0.187221	0.851487		none
RUNX3-AS1	6.99003	-0.498409	0.166729	-2.98934	0.00279581	0.00525525	none
AL445471.1	0.714121	0.766767	0.357963	2.14203	0.0321909	0.0513281	none
MIR4425	0.0158286	0.0357195	3.41674	0.0104543	0.991659		none
LINC02793	0.323248	0.462115	0.39429	1.17202	0.241189	0.317444	none
AL050344.1	0.36165	0.771959	0.384146	2.00955	0.0444789	0.0689955	none
IFITM3P7	0.702672	-0.519964	0.242858	-2.14102	0.0322725	0.0514509	none
AL031432.1	0.379076	0.0138662	0.308649	0.0449256	0.964167	0.973963	none
SYF2	3153.64	-0.246247	0.0396066	-6.21733	5.05683e-10	1.8164e-09	none
AL031432.4	25.544	-0.0611507	0.09453	-0.646892	0.517702	0.608592	none
AL031432.5	3.81967	-0.348943	0.122424	-2.85028	0.00436806	0.00799213	none
RSRP1	2241.81	-0.20636	0.0749113	-2.75472	0.00587428	0.0105517	none
AL031432.3	8.24949	-0.013183	0.120264	-0.109617	0.912713	0.936109	none
AL031432.2	11.0091	-0.17275	0.170116	-1.01549	0.309873	0.395162	none
RHD	33.7048	-0.950738	0.150251	-6.32765	2.48925e-10	9.15462e-10	none
SDHDP6	8.05287	-1.34576	0.136982	-9.82438	8.84164e-23	6.42309e-22	down
AL928711.1	2.46906	-0.865389	0.151943	-5.6955	1.23008e-08	3.98972e-08	none
TMEM50A	8012.3	0.159076	0.0392535	4.05252	5.06696e-05	0.000117828	none
RHCE	76.8504	1.35828	0.118329	11.4789	1.68408e-30	1.73134e-29	up
AL031284.1	1.56244	-0.764765	0.135559	-5.64158	1.68501e-08	5.40912e-08	none
MACO1	3551.05	0.620504	0.0458655	13.5288	1.05785e-41	1.66465e-40	none
LDLRAP1	2692.4	0.232447	0.0561869	4.13703	3.51836e-05	8.32025e-05	none
AL606491.1	9.91295	-0.452224	0.104069	-4.34543	1.39002e-05	3.43109e-05	none
MAN1C1	1240.93	-0.193286	0.099107	-1.95027	0.0511437	0.0783449	none
AL031280.1	4.76718	0.93804	0.179745	5.21873	1.80154e-07	5.30837e-07	none
SELENON	6638.56	0.120289	0.0478435	2.51421	0.0119299	0.0204618	none
AL020996.2	0
AL020996.1	22.9083	-0.661943	0.072936	-9.07566	1.12987e-19	7.02292e-19	none
MTFR1L	1684.84	-0.510333	0.0446135	-11.439	2.67036e-30	2.72579e-29	none
AL020996.3	0
AUNIP	245.04	2.22405	0.106621	20.8594	1.25188e-96	1.0232e-94	up
AL033528.2	1.19554	0.342319	0.178169	1.92131	0.0546923	0.0832555	none
PAQR7	813.593	0.144416	0.0635934	2.27093	0.0231512	0.0378215	none
STMN1	11425.4	1.78913	0.0987975	18.1091	2.70125e-73	1.17946e-71	up
SNRPFP2	0.818405	0.365424	0.253368	1.44227	0.149226	0.207506	none
AL033528.1	0.742282	0.718809	0.260237	2.76213	0.00574251	0.0103316	none
MIR3917	0
PAFAH2	1607.87	0.29587	0.0548535	5.39382	6.89768e-08	2.10412e-07	none
RNU6-110P	0.257427	0.00782708	0.40302	0.0194211	0.984505	0.988616	none
AL592064.1	0.057762	-0.307818	1.08	-0.285016	0.775632		none
AL592064.2	0.0218503	0.0668474	1.82792	0.0365703	0.970828		none
EXTL1	370.312	0.472611	0.194351	2.43173	0.0150267	0.0253605	none
SLC30A2	129.397	1.32838	0.214361	6.1969	5.7585e-10	2.06042e-09	up
AL391650.2	4.41559	1.38494	0.337678	4.10137	4.10707e-05	9.64934e-05	up
TRIM63	15.9	-0.554711	0.178917	-3.10038	0.00193274	0.00371971	none
PDIK1L	1498.59	0.57983	0.0573034	10.1186	4.56918e-24	3.5405e-23	none
FAM110D	203.924	-2.14389	0.119445	-17.9488	4.9016e-72	2.05055e-70	down
C1orf232	0.512529	0.52843	0.334504	1.57974	0.114166	0.162916	none
AL391650.1	8.3672	-0.867356	0.131855	-6.57809	4.76515e-11	1.83904e-10	none
ZNF593	0
CNKSR1	1732.32	0.715527	0.0789224	9.0662	1.2324e-19	7.63953e-19	none
CATSPER4	1.80277	0.217596	0.200868	1.08328	0.278685	0.3603	none
ZPLD2P	12.6928	-0.754161	0.189693	-3.9757	7.0174e-05	0.000160502	none
AL355877.2	0.596211	0.080302	0.234137	0.342971	0.731621	0.795226	none
CEP85	1404.45	1.05814	0.0657438	16.0949	2.76884e-58	7.53905e-57	up
AL355877.1	2.2999	1.71521	0.199136	8.61325	7.1016e-18	4.04019e-17	up
SH3BGRL3	6227.91	0.533018	0.0743543	7.16862	7.57549e-13	3.28959e-12	none
UBXN11	1480.01	0.673381	0.0880341	7.64909	2.02399e-14	9.64017e-14	none
CD52	933.585	0.692921	0.142015	4.87922	1.06507e-06	2.93674e-06	none
CRYBG2	184.881	3.24834	0.147317	22.05	9.55841e-108	1.03796e-105	up
AL451139.1	0.978845	1.1207	0.262507	4.26921	1.9617e-05	4.76564e-05	up
ZNF683	170.22	0.495956	0.157346	3.15201	0.00162152	0.00315339	none
LIN28A	38.7855	4.76197	0.40075	11.8826	1.45687e-32	1.62901e-31	up
DHDDS	2554.15	-0.888065	0.0459389	-19.3315	2.92028e-83	1.70229e-81	none
AL513365.1	6.99966	-0.0975555	0.138291	-0.705435	0.48054	0.572762	none
DHDDS-AS1	18.5222	-0.174511	0.117605	-1.48388	0.137841	0.193066	none
HMGN2	11838.2	0.559671	0.0508611	11.0039	3.65845e-28	3.4059e-27	none
DPPA2P2	0.206252	-0.179444	0.503433	-0.356442	0.72151	0.78731	none
RPS6KA1	3394.18	0.751384	0.0659713	11.3896	4.71377e-30	4.77658e-29	none
MIR1976	0.0057518	0.0123617	4.83525	0.00255659	0.99796		none
RN7SL679P	0.171063	0.221394	0.850054	0.260448	0.794519	0.844746	none
RNU7-29P	0.0131863	-0.0486716	4.18839	-0.0116206	0.990728		none
AL627313.1	0.0100608	0.0201559	3.97048	0.00507643	0.99595		none
AL627082.2	0.0120831	-0.0053821	4.21147	-0.00127796	0.99898		none
AL627082.1	0.0138318	0.0253462	3.64913	0.00694581	0.994458		none
AL512408.1	56.3944	0.471897	0.084097	5.61134	2.00762e-08	6.40359e-08	none
ARID1A	8936.28	0.26785	0.0486103	5.51016	3.58514e-08	1.1218e-07	none
PIGV	1348.44	-0.171294	0.0568034	-3.01557	0.00256498	0.00484776	none
RN7SL165P	1.11836	-0.275247	0.22345	-1.23181	0.218022	0.290169	none
AL034380.2	0.0825233	0.128039	0.923274	0.13868	0.889703		none
ZDHHC18	2318.46	0.11063	0.0551492	2.00601	0.0448549	0.0695364	none
SFN	3612.69	0.891989	0.13901	6.4167	1.39258e-10	5.20943e-10	none
GPN2	1442.03	-0.0537267	0.0380493	-1.41203	0.157942	0.218141	none
AL034380.1	0
GPATCH3	737.645	0.0651544	0.0532413	1.22376	0.221044	0.293758	none
NUDC	6772.12	0.493153	0.0632121	7.80157	6.11425e-15	3.00024e-14	none
NR0B2	3.17662	0.594449	0.317287	1.87354	0.0609944	0.0919953	none
KDF1	1287.95	0.749172	0.077393	9.68009	3.66395e-22	2.58129e-21	none
RPL12P13	3.82365	0.08427	0.119137	0.707339	0.479356	0.571609	none
AL356390.1	2.2409	0.0709204	0.162097	0.437517	0.661736	0.737646	none
OSTCP2	3.27621	0.265384	0.121937	2.1764	0.0295256	0.0473809	none
TRNP1	459.389	-0.978384	0.112846	-8.67007	4.31865e-18	2.48401e-17	none
TENT5B	1142.91	-0.643964	0.130129	-4.94867	7.47228e-07	2.08855e-06	none
SLC9A1	4908.61	0.398621	0.0590855	6.74651	1.51448e-11	6.04029e-11	none
AL590640.2	1.4058	0.116631	0.175394	0.664965	0.506073	0.597613	none
CHCHD3P3	12.4418	0.190352	0.0803648	2.3686	0.0178557	0.0297383	none
NPM1P39	16.3459	0.423632	0.0907955	4.66578	3.07443e-06	8.12547e-06	none
SNRPEP7	0.106389	0.146967	0.674568	0.217869	0.827531		none
AL590640.1	0.0868381	0.0185149	0.831537	0.0222659	0.982236		none
WDTC1	5607.67	-0.426084	0.0460073	-9.26123	2.0209e-20	1.30799e-19	none
FO393419.3	5.84844	-1.03599	0.10613	-9.76151	1.64679e-22	1.17825e-21	down
TMEM222	2483.66	0.186649	0.0536674	3.47788	0.00050539	0.00104854	none
RNU6-48P	1.03446	0.112123	0.204631	0.547929	0.58374	0.669234	none
ACTG1P20	20.1806	0.0696275	0.124199	0.56061	0.575063	0.661697	none
SYTL1	1743.7	0.588614	0.101748	5.785	7.25145e-09	2.39735e-08	none
MAP3K6	2226.55	-0.37791	0.0741644	-5.09556	3.47708e-07	1.0001e-06	none
FCN3	90.2678	-0.670884	0.109583	-6.12217	9.23093e-10	3.25939e-09	none
CD164L2	88.2348	-1.04394	0.168462	-6.1969	5.75863e-10	2.06042e-09	down
FO393419.1	0.182029	-0.353936	0.548839	-0.644881	0.519004	0.609889	none
GPR3	55.4145	-0.0683549	0.12316	-0.555009	0.578888	0.665168	none
WASF2	10927.2	-0.748769	0.0516967	-14.4839	1.53151e-47	2.98086e-46	none
FO393419.2	1.74953	1.67315	0.470093	3.55919	0.000372007	0.000785176	up
BX293535.1	6.90388	0.999903	0.181123	5.52057	3.3791e-08	1.05942e-07	none
AHDC1	2460.55	-0.355733	0.0633559	-5.61484	1.96749e-08	6.27951e-08	none
FGR	579.096	-0.454158	0.100309	-4.52757	5.96655e-06	1.53196e-05	none
AL031729.1	14.6192	0.233084	0.109671	2.12531	0.0335606	0.0533066	none
LINC02574	3.61477	1.76883	0.227401	7.77849	7.33925e-15	3.58907e-14	up
IFI6	21353.1	2.89484	0.160256	18.0638	6.14478e-73	2.65776e-71	up
AL445490.1	30.9704	1.28939	0.18482	6.97646	3.02712e-12	1.2658e-11	up
RNU6-949P	0.0248482	0.0179665	3.16771	0.00567176	0.995475		none
CHMP1AP1	0.103761	0.127645	1.67206	0.0763398	0.939149		none
RNU6-424P	0.0161632	0.00759589	3.2332	0.00234934	0.998125		none
AL020997.5	1.54397	-0.667993	0.176313	-3.78868	0.000151451	0.000334169	none
FAM76A	885.375	-0.507466	0.0403848	-12.5658	3.25678e-36	4.22472e-35	none
AL020997.1	4.27066	-0.0820306	0.115621	-0.709478	0.478028	0.570316	none
RPEP3	0.954383	-0.732201	0.3352	-2.18437	0.028935	0.0465079	none
STX12	3700.24	-0.73982	0.0403134	-18.3517	3.19885e-75	1.4857e-73	none
AL020997.2	2.60896	-0.734237	0.220005	-3.33736	0.000845777	0.00170544	none
AL020997.3	5.50533	-0.773892	0.107931	-7.17023	7.48732e-13	3.25284e-12	none
RNU6-1245P	0.102155	-0.291541	0.735166	-0.396565	0.691689		none
AL020997.4	0.626448	-0.0730355	0.310566	-0.235169	0.814078	0.859581	none
PPP1R8	2753.84	0.113377	0.0336217	3.37215	0.000745839	0.00151563	none
SCARNA1	3.72454	2.74417	0.451651	6.07586	1.23324e-09	4.3137e-09	up
THEMIS2	1234.67	0.144818	0.10123	1.43059	0.152549	0.211582	none
RPA2	2979.86	0.0738449	0.0435649	1.69506	0.0900649	0.131314	none
SMPDL3B	643.221	1.00781	0.104182	9.67354	3.90614e-22	2.74938e-21	up
AL512288.1	1.77336	-0.0404587	0.168448	-0.240186	0.810186	0.856326	none
XKR8	624.408	0.195201	0.0474465	4.11413	3.88647e-05	9.15116e-05	none
EYA3	2148.28	0.205301	0.0509213	4.03172	5.5369e-05	0.000128314	none
AL512288.2	4.45026	-0.144515	0.137674	-1.04969	0.29386	0.377244	none
RN7SL559P	1.98825	0.453425	0.276982	1.63702	0.101627	0.146566	none
SPCS2P4	67.3345	0.541538	0.0879714	6.15584	7.46786e-10	2.65379e-09	none
AL137792.2	0.0806751	-0.125492	1.00062	-0.125415	0.900195		none
AL137792.1	0.471329	0.225005	0.248575	0.90518	0.36537	0.454575	none
RNU6-176P	0.205195	-0.458008	0.431363	-1.06177	0.28834	0.371096	none
PTAFR	1115.83	0.00844211	0.0986385	0.0855864	0.931795	0.950396	none
DNAJC8	5131.6	-0.0705804	0.0374317	-1.88558	0.0593519	0.0897922	none
ATP5IF1	4385.2	0.967831	0.0687283	14.082	4.90071e-45	8.79333e-44	none
AL353622.1	118.043	1.15722	0.121301	9.54005	1.42763e-21	9.75846e-21	up
AL353622.2	2.60476	0.586783	0.172506	3.40153	0.0006701	0.00136942	none
SESN2	1205.79	0.00967444	0.0635663	0.152195	0.879034	0.909694	none
MED18	897.369	0.298784	0.0460979	6.48151	9.0809e-11	3.43427e-10	none
PHACTR4	3625.16	0.116619	0.0438676	2.65844	0.00785034	0.0138452	none
CR391992.1	1.40124	0.745927	0.347539	2.14631	0.031848	0.0508395	none
RNU6ATAC27P	1.15298	0.486562	0.247902	1.96272	0.0496787	0.0763293	none
RCC1	3281.27	1.19427	0.0716502	16.6681	2.2371e-62	6.83693e-61	up
SNHG3	1090.93	1.02798	0.100204	10.2588	1.08039e-24	8.60974e-24	up
SNORA73A	0
SNORA73B	317.635	4.50755	0.274744	16.4063	1.72299e-60	4.96822e-59	up
PRDX3P2	4.47842	0.99579	0.165695	6.00979	1.85764e-09	6.40943e-09	none
AL513497.1	59.3873	1.04436	0.105375	9.91092	3.7318e-23	2.76523e-22	up
TRNAU1AP	978.608	0.0802776	0.0495501	1.62013	0.105205	0.151303	none
SNHG12	540.656	0.568964	0.0938213	6.06433	1.32503e-09	4.62246e-09	none
SNORD99	14.1849	1.30367	0.132877	9.81117	1.00791e-22	7.30476e-22	up
SNORA61	0
SNORA44	0
SNORA16A	0
TAF12	1381.75	0.353039	0.0459845	7.67735	1.62418e-14	7.78596e-14	none
RAB42	288.133	0.192347	0.0922534	2.08499	0.0370706	0.0584212	none
LINC01715	16.6531	-0.805475	0.0879272	-9.1607	5.15603e-20	3.26177e-19	none
AL360012.1	0
RNU11	0.0950576	-0.0736443	1.1988	-0.0614316	0.951015		none
GMEB1	1273.18	0.0677994	0.0359686	1.88496	0.0594348	0.0899057	none
AL645729.1	0.365221	-0.328938	0.307652	-1.06919	0.284985	0.36736	none
YTHDF2	5722.09	0.163586	0.036374	4.49733	6.88117e-06	1.75541e-05	none
OPRD1	161.209	2.7905	0.202207	13.8002	2.54141e-43	4.26671e-42	up
AL009181.1	1.15932	0.198073	0.214478	0.92351	0.355741	0.444486	none
EPB41	3422.14	0.00156637	0.0722685	0.0216744	0.982708	0.987329	none
AL138785.1	6.9855	-0.266219	0.10874	-2.44822	0.0143562	0.0243102	none
Metazoa_SRP	0.106753	0.0651793	0.693234	0.0940221	0.925092		none
TMEM200B	342.056	-0.80611	0.12905	-6.24648	4.19816e-10	1.51901e-09	none
AL357500.1	0.855897	-0.574594	0.311666	-1.84362	0.0652383	0.0978564	none
SRSF4	5291.01	-0.086972	0.0406209	-2.14106	0.032269	0.0514471	none
AL357500.2	0
MECR	1202.67	-0.224202	0.0540531	-4.14781	3.35672e-05	7.9589e-05	none
AL590729.1	5.81501	0.117977	0.153058	0.770802	0.440824	0.532864	none
PTPRU	2788.71	0.435173	0.112775	3.85876	0.000113965	0.000255	none
LINC01756	0.716321	1.22741	0.377743	3.24933	0.00115679	0.0022945	up
AL671862.1	0.0434878	0.0754084	1.33492	0.056489	0.954952		none
AC092265.1	0.0856721	0.0284945	0.85629	0.0332767	0.973454		none
AL645944.2	0.349755	0.216895	0.396181	0.547464	0.58406	0.669584	none
AL645944.1	0.0188072	-0.0101566	2.91573	-0.00348337	0.997221		none
LINC01648	1.28527	2.27924	0.292387	7.79529	6.42617e-15	3.15026e-14	up
AL137076.1	0.120088	0.272046	0.84196	0.323111	0.746611		none
AL021921.1	0.00990517	-0.0334998	3.72175	-0.00900109	0.992818		none
AL161638.2	0.218512	0.663686	0.614662	1.07976	0.28025	0.362069	none
AL161638.1	0.064374	0.219806	1.21878	0.180349	0.856879		none
MATN1	10.5891	0.0569304	0.111303	0.511491	0.609007	0.692207	none
MATN1-AS1	84.4484	0.14456	0.080088	1.80502	0.0710717	0.105836	none
AL137857.1	0.892	0.329197	0.362607	0.907859	0.363952	0.452952	none
LAPTM5	6378.83	0.731513	0.0907323	8.06232	7.48608e-16	3.85976e-15	none
MIR4420	0.907549	0.108606	0.236436	0.459346	0.645986	0.724555	none
AL137027.1	1.65696	1.63102	0.332612	4.90366	9.40652e-07	2.60677e-06	up
LINC01778	19.0842	-1.05579	0.136248	-7.74908	9.25625e-15	4.50256e-14	down
RN7SKP91	0.228083	0.548894	1.58924	0.345382	0.729807	0.793762	none
AL445235.1	0.178401	-0.117721	0.611194	-0.192608	0.847266	0.885	none
SDC3	7243.69	-0.541772	0.0692203	-7.82678	5.00535e-15	2.46638e-14	none
RN7SL371P	0.0593839	0.0121595	0.952786	0.012762	0.989818		none
PUM1	7171.41	-0.252907	0.0389602	-6.49143	8.50263e-11	3.22191e-10	none
AL356320.2	1.79242	1.63541	0.396004	4.12978	3.63108e-05	8.57664e-05	up
AL356320.1	1.38168	1.28135	0.41977	3.0525	0.00226944	0.00432478	up
SELENOWP1	0.380315	0.0685202	0.245164	0.279487	0.779871	0.833433	none
AC114495.1	0.823438	-0.0984518	0.230959	-0.426274	0.669908	0.744731	none
NKAIN1	2629.93	3.98833	0.204544	19.4986	1.12755e-84	6.8509e-83	up
SNRNP40	2592.1	0.381703	0.0419016	9.10951	8.27577e-20	5.17407e-19	none
AC114495.2	15.2681	-0.0392054	0.108085	-0.362728	0.716808	0.783426	none
ZCCHC17	1733.73	0.34366	0.0504983	6.80537	1.0079e-11	4.06792e-11	none
AL451070.1	1.10946	0.487718	0.305203	1.59801	0.11004	0.157533	none
FABP3	528.084	-0.0321912	0.121536	-0.264869	0.79111	0.842074	none
SERINC2	11641.3	1.38196	0.0964062	14.3348	1.3261e-46	2.49645e-45	up
AC209007.1	5.84442	-0.510663	0.116925	-4.36744	1.25711e-05	3.11674e-05	none
RNU6-40P	0.15791	0.313133	1.46452	0.213813	0.830693		none
LDC1P	6.65448	1.1221	0.254633	4.40672	1.04946e-05	2.62673e-05	up
LINC01226	23.3629	0.710738	0.159624	4.45259	8.48416e-06	2.1441e-05	none
AC114488.1	12.0245	-1.64264	0.166731	-9.85206	6.71528e-23	4.91256e-22	down
TINAGL1	2382.17	-1.59994	0.121679	-13.1489	1.72625e-39	2.52608e-38	down
HCRTR1	6.04194	-1.58824	0.136521	-11.6337	2.77841e-31	2.94539e-30	down
PEF1	4248.71	0.136614	0.0453551	3.01209	0.00259453	0.00489876	none
PEF1-AS1	18.4552	-0.201962	0.12266	-1.64652	0.0996565	0.144027	none
AC114488.2	1.07473	-0.564401	0.16054	-3.51564	0.000438701	0.000917261	none
COL16A1	6419.47	0.173581	0.109122	1.59071	0.111675	0.159738	none
ADGRB2	1985.73	1.99006	0.14388	13.8314	1.6472e-43	2.78889e-42	up
MIR4254	0.2739	0.547662	0.408607	1.34032	0.180142	0.245161	none
AL354919.2	1.62412	2.14998	0.261631	8.21759	2.07637e-16	1.10045e-15	up
SPOCD1	280.255	2.51488	0.149792	16.7891	2.93342e-63	9.18499e-62	up
AL354919.1	2.08632	0.890275	0.207368	4.29321	1.76104e-05	4.30161e-05	none
AL136115.2	12.7006	1.21119	0.157621	7.68415	1.54017e-14	7.3902e-14	up
PTP4A2	20768.7	0.424806	0.0672413	6.31763	2.65605e-10	9.74853e-10	none
AL136115.1	11.0954	1.40772	0.190761	7.37953	1.58847e-13	7.15761e-13	up
AL136115.3	0.486584	0.568534	0.325009	1.74929	0.0802409	0.11818	none
KHDRBS1	11747.6	0.230767	0.0283481	8.14049	3.93682e-16	2.05938e-15	none
AL445248.1	8.02567	0.537377	0.165651	3.24403	0.00117852	0.00233569	none
TMEM39B	861.38	0.0295065	0.0594392	0.496415	0.619602	0.70161	none
MIR5585	0.233367	0.0298334	0.413027	0.0722311	0.942418	0.958	none
KPNA6	5353.63	0.0169564	0.0490917	0.345403	0.729791	0.793762	none
AL049795.2	0.199129	-0.0269149	0.45721	-0.0588677	0.953057	0.965352	none
TXLNA	6542.85	0.260328	0.0405865	6.41415	1.41607e-10	5.29516e-10	none
CCDC28B	303.356	1.03565	0.0928933	11.1488	7.25392e-29	6.94604e-28	up
AL049795.1	3.82089	0.219506	0.1438	1.52647	0.126894	0.179318	none
IQCC	293.194	0.701211	0.0640357	10.9503	6.62077e-28	6.08358e-27	none
DCDC2B	17.821	0.394255	0.157169	2.50847	0.0121254	0.0207731	none
TMEM234	374.423	0.410635	0.0606963	6.7654	1.32943e-11	5.32165e-11	none
EIF3I	11891.3	0.254067	0.0514743	4.9358	7.9822e-07	2.22552e-06	none
MTMR9LP	249.162	-0.739969	0.0973195	-7.60351	2.88211e-14	1.35768e-13	none
FAM167B	246.555	0.327114	0.088654	3.68978	0.000224446	0.000485939	none
LCK	589.617	0.976359	0.144589	6.75263	1.45188e-11	5.79971e-11	none
HDAC1	7167.67	0.559059	0.0512406	10.9105	1.02724e-27	9.37143e-27	none
MARCKSL1	21552	1.46854	0.0747224	19.6533	5.41657e-86	3.38971e-84	up
AL109945.1	2.4302	0.672227	0.165737	4.05598	4.99242e-05	0.000116169	none
TSSK3	16.1782	-0.252834	0.123887	-2.04084	0.0412667	0.0644348	none
FAM229A	97.3957	0.00948741	0.104033	0.0911963	0.927337	0.947173	none
BSDC1	6641.27	0.0218347	0.0409152	0.533656	0.59358	0.678313	none
GAPDHP20	1.13991	0.0796304	0.246612	0.322898	0.746773	0.807359	none
AL356986.1	0.199737	0.0464438	0.701483	0.066208	0.947212	0.961283	none
LRRC37A12P	0.909115	1.01284	0.345939	2.9278	0.00341375	0.00634208	up
RN7SL122P	0.220214	0.377845	1.07837	0.350386	0.726049	0.790913	none
AL033529.1	0.339731	0.216841	0.287864	0.753274	0.451285	0.543578	none
ZBTB8B	23.2085	0.169391	0.226703	0.747193	0.454947	0.547271	none
ZBTB8A	603.597	-0.13569	0.0483188	-2.80822	0.00498166	0.00903385	none
ZBTB8OS	1032.65	0.411867	0.0496318	8.29844	1.05486e-16	5.66382e-16	none
RBBP4	8200.18	0.320523	0.0553628	5.7895	7.05961e-09	2.33662e-08	none
SYNC	232.498	-0.830871	0.105021	-7.91145	2.54399e-15	1.2753e-14	none
AC114489.1	0.795289	-0.831631	0.271059	-3.06808	0.0021544	0.00412042	none
KIAA1522	14310.5	0.715355	0.0636846	11.2328	2.81464e-29	2.74671e-28	none
YARS1	5634.7	0.735432	0.0582147	12.6331	1.38717e-36	1.82418e-35	none
S100PBP	1757.25	0.124214	0.0413855	3.00138	0.0026876	0.00506305	none
FNDC5	126.309	-0.861636	0.123855	-6.95684	3.47993e-12	1.45092e-11	none
HPCA	24.2637	1.05469	0.130567	8.07776	6.59688e-16	3.4124e-15	up
TMEM54	2057.51	1.3256	0.0865265	15.3202	5.60537e-53	1.30633e-51	up
AL031602.2	12.569	-0.189304	0.0896294	-2.11208	0.0346796	0.0549415	none
RNF19B	2249.73	0.44421	0.0584957	7.5939	3.10419e-14	1.45929e-13	none
AL031602.1	6.50751	0.82329	0.171845	4.79089	1.66045e-06	4.50135e-06	none
AL355864.1	5.26954	1.026	0.149092	6.88164	5.91691e-12	2.42841e-11	up
AL355864.2	2.59155	0.022583	0.174607	0.129336	0.897092	0.924069	none
AL020995.1	2.28089	0.539239	0.286691	1.8809	0.0599849	0.0906454	none
AK2	7696.45	0.214529	0.0469363	4.57064	4.86228e-06	1.26083e-05	none
AZIN2	616.955	0.72346	0.0704424	10.2702	9.59769e-25	7.66314e-24	none
AL662907.1	39.7966	0.196601	0.0855937	2.29691	0.0216237	0.0354977	none
TRIM62	843.119	0.803599	0.0622359	12.9121	3.84458e-38	5.3775e-37	none
AL662907.2	25.0451	0.31116	0.0959481	3.243	0.00118278	0.00234382	none
AL662907.3	0.431852	-0.369533	0.363926	-1.01541	0.309912	0.3952	none
ZNF362	2381.17	-0.0562543	0.0488881	-1.15068	0.249866	0.327456	none
AL513327.2	12.5358	0.752909	0.142016	5.30157	1.14809e-07	3.43804e-07	none
A3GALT2	2.62181	-0.340511	0.187023	-1.82069	0.0686539	0.102562	none
AL513327.1	91.1211	-0.0515854	0.100709	-0.512222	0.608496	0.691746	none
PHC2	6536.77	0.0951698	0.0469148	2.02857	0.0425025	0.0661691	none
MIR3605	2.08661	0.321326	0.168878	1.90271	0.0570784	0.086595	none
RN7SKP16	10.9275	-0.0919366	0.141147	-0.651352	0.514819	0.605854	none
PHC2-AS1	5.38281	0.530366	0.159277	3.32983	0.000868975	0.00174884	none
TLR12P	1.51418	-0.118002	0.177189	-0.665965	0.505434	0.596981	none
ZSCAN20	264.37	0.126589	0.0731032	1.73165	0.0833358	0.122349	none
AC115285.1	3.07107	0.300793	0.147298	2.04208	0.041144	0.0642717	none
CSMD2	218.546	2.10284	0.136743	15.378	2.29856e-53	5.41445e-52	up
HSPD1P14	0.251436	0.379329	1.16788	0.324801	0.745331	0.806436	none
HMGB4	0.370245	0.569166	0.8459	0.672853	0.501041	0.592666	none
CSMD2-AS1	0.448012	0.950756	0.652988	1.45601	0.14539	0.202613	none
RNA5SP42	0.0432559	0.0520732	1.80473	0.0288537	0.976981		none
C1orf94	5.90238	2.37731	0.447246	5.31543	1.06407e-07	3.19498e-07	up
AC115286.1	0.010539	-0.00537759	3.95873	-0.00135841	0.998916		none
AC099565.1	0.159822	0.300407	0.778807	0.385726	0.699699		none
MIR552	0.0138185	0.0382821	4.99129	0.00766979	0.99388		none
SMIM12	1845.85	0.0582825	0.0439841	1.32508	0.185145	0.251179	none
GJB5	139.449	0.546916	0.217231	2.51767	0.0118133	0.0202784	none
GJB4	7.0401	0.597432	0.258801	2.30846	0.0209737	0.0345022	none
AL121988.1	0.226763	0.143014	0.486318	0.294074	0.768701	0.8247	none
GJB3	235.796	1.57038	0.239914	6.54559	5.92599e-11	2.27197e-10	up
GJA4	808.888	-0.73865	0.0927776	-7.96151	1.69955e-15	8.60245e-15	none
AL122010.1	0
DLGAP3	60.9824	1.57502	0.159312	9.88639	4.76933e-23	3.51701e-22	up
AC114490.3	46.8778	-0.696104	0.0892004	-7.80382	6.00595e-15	2.94835e-14	none
AC114490.1	16.5096	-0.412988	0.100387	-4.11394	3.88966e-05	9.15821e-05	none
AC114490.2	0.0359124	-0.0682085	1.43362	-0.0475778	0.962053		none
TMEM35B	0.622576	-0.209752	0.211924	-0.989749	0.322297	0.408701	none
ZMYM6	749.569	0.0102322	0.0369238	0.277117	0.78169	0.834647	none
ZMYM1	831.241	0.0129696	0.0564052	0.229937	0.818141	0.86263	none
RPL12P45	0.0706741	-0.212856	1.1743	-0.181262	0.856162		none
EFCAB14P1	0.498417	0.236544	0.236755	0.999109	0.317742	0.403683	none
AL590434.1	5.51017	-2.76627	0.184885	-14.9621	1.29822e-50	2.81683e-49	down
SFPQ	18018	0.351264	0.0318423	11.0314	2.69745e-28	2.52352e-27	none
ZMYM4	5244.84	0.0873907	0.0466875	1.87182	0.0612313	0.0923283	none
RN7SL503P	1.04725	2.00724	0.676028	2.96917	0.00298607	0.00559274	up
SNORA62	0.037772	0.0616586	2.25902	0.0272944	0.978225		none
RPL5P4	22.5269	-0.129214	0.103245	-1.25154	0.210739	0.281578	none
ZMYM4-AS1	3.38945	0.858379	0.211051	4.06717	4.75878e-05	0.000110987	none
KIAA0319L	7877.62	0.42067	0.0631223	6.66436	2.65825e-11	1.0422e-10	none
AC004865.1	2.02274	2.00235	0.411796	4.86248	1.15925e-06	3.1857e-06	up
NCDN	2992.24	0.979998	0.0706176	13.8775	8.6674e-44	1.48223e-42	none
TFAP2E-AS1	14.4041	0.0832209	0.109474	0.760189	0.447142	0.539336	none
TFAP2E	73.9207	0.323613	0.117375	2.75709	0.00583187	0.0104805	none
PSMB2	6575.38	0.54585	0.0583601	9.35315	8.50788e-21	5.61819e-20	none
C1orf216	1390.83	0.31178	0.0466648	6.68126	2.36888e-11	9.31692e-11	none
CLSPN	655.316	2.94466	0.110725	26.5944	7.87354e-156	2.28901e-153	up
AL354864.1	0.105394	0.172892	0.648472	0.266614	0.789766		none
AGO4	1841.16	-0.535506	0.0532889	-10.0491	9.27027e-24	7.07696e-23	none
AGO1	3666.09	-0.106632	0.047118	-2.26308	0.0236305	0.0385428	none
CFAP97P1	0.189504	0.0854325	0.621568	0.137447	0.890678	0.918616	none
AL139286.2	2.56265	0.594868	0.256916	2.31542	0.0205901	0.0339174	none
AL139286.1	0
AGO3	1725.55	-0.409817	0.0599967	-6.83067	8.45215e-12	3.43272e-11	none
AL138787.2	6.58554	0.220422	0.155244	1.41984	0.155654	0.215381	none
AL138787.1	6.32732	0.34788	0.163762	2.1243	0.0336449	0.0534312	none
TEKT2	91.8666	0.729132	0.158301	4.60597	4.10538e-06	1.07213e-05	none
ADPRS	2163.48	0.56448	0.0568928	9.92181	3.34617e-23	2.4867e-22	none
COL8A2	4003.19	0.627228	0.119449	5.25099	1.51281e-07	4.4884e-07	none
TRAPPC3	3537.49	0.186384	0.0438285	4.25259	2.11314e-05	5.11622e-05	none
MAP7D1	5947.17	-0.528849	0.0627957	-8.42173	3.7097e-17	2.03586e-16	none
RN7SL131P	0.148314	-0.47652	0.520013	-0.916362	0.359477		none
THRAP3	11228.1	0.0169112	0.0309962	0.545588	0.585349	0.67081	none
UBE2V2P4	1.41906	1.78534	0.473944	3.76698	0.000165236	0.000362981	up
SH3D21	1159.48	0.676002	0.109999	6.14551	7.9707e-10	2.82745e-09	none
EVA1B	0
AL591845.1	622.351	0.839396	0.203428	4.12627	3.687e-05	8.70382e-05	none
STK40	3663.34	-0.423774	0.0572493	-7.40226	1.3389e-13	6.06041e-13	none
LSM10	1409.01	0.471524	0.0658083	7.16511	7.77257e-13	3.37389e-12	none
RNU4-27P	0.0518885	0.0265402	1.63936	0.0161894	0.987083		none
OSCP1	790.091	0.209136	0.0735096	2.84502	0.00444089	0.00811634	none
SNORA63C	2.99198	0.770711	0.250435	3.07749	0.00208751	0.00400099	none
MRPS15	3657.11	0.321783	0.0665453	4.83554	1.32782e-06	3.63069e-06	none
CSF3R	1682.76	1.03153	0.130147	7.92584	2.266e-15	1.1393e-14	up
FTLP18	0.0272839	0.0694348	2.36196	0.0293971	0.976548		none
AL596257.1	0.847474	0.659253	0.32044	2.05734	0.039654	0.0621342	none
AC117945.2	1.14095	2.4953	0.61041	4.0879	4.35294e-05	0.000101947	up
AC117945.1	0.153777	0.268883	0.676572	0.397419	0.691058		none
GRIK3	1468.54	0.116791	0.197475	0.591423	0.554237	0.642627	none
AL031430.1	0.415761	0.626871	0.503758	1.24439	0.213356	0.284669	none
AL353604.1	0.637756	0.967641	0.418411	2.31266	0.0207415	0.0341423	none
MIR4255	0.0101473	0.0227359	4.61641	0.00492501	0.99607		none
RNU6-636P	0.0208972	-0.058632	2.90225	-0.0202022	0.983882		none
RNA5SP43	0.028811	-0.0378836	2.01868	-0.0187665	0.985027		none
RPS29P6	0.409962	0.22857	0.398504	0.57357	0.566259	0.653563	none
LINC01137	400.959	0.51091	0.0767348	6.65813	2.77325e-11	1.08562e-10	none
ZC3H12A	1070.57	-0.0249033	0.0955037	-0.260757	0.79428	0.844684	none
MIR6732	0
MEAF6	5842.25	0.54313	0.0516929	10.5069	8.03217e-26	6.71551e-25	none
MIR5581	6.60864	0.123482	0.14525	0.850138	0.395249	0.48599	none
SNIP1	1347.25	-0.108956	0.0350876	-3.10525	0.0019012	0.00366255	none
FTH1P1	4.62857	0.00492431	0.129657	0.0379795	0.969704	0.977836	none
AL034379.1	10.4887	-0.00878866	0.103198	-0.085163	0.932132	0.95057	none
DNALI1	2449.68	0.726261	0.152964	4.74792	2.05522e-06	5.52106e-06	none
GNL2	4630.83	0.459748	0.0502942	9.14117	6.17818e-20	3.89231e-19	none
AL513220.1	1.7017	-0.101582	0.251318	-0.404198	0.686067	0.758437	none
RSPO1	195.484	-1.76365	0.207802	-8.48719	2.11699e-17	1.17555e-16	down
C1orf109	1131.57	0.0570558	0.0481925	1.18391	0.236447	0.311917	none
CDCA8	1317.9	3.03146	0.109632	27.6513	2.695e-168	1.06717e-165	up
EPHA10	467.141	1.40795	0.119908	11.7419	7.77198e-32	8.41976e-31	up
ACTN4P2	0.606118	1.11346	0.316278	3.52052	0.000430707	0.000901326	up
AL929472.1	0.275645	0.548773	0.344034	1.59511	0.110687	0.15839	none
MANEAL	523.977	1.55379	0.106614	14.5739	4.11461e-48	8.17123e-47	up
AL929472.3	0
YRDC	1001.1	0.402232	0.056263	7.14913	8.73288e-13	3.78038e-12	none
C1orf122	2021.33	0.862245	0.0829137	10.3993	2.49724e-25	2.04763e-24	none
MTF1	1770.81	-0.254111	0.0520678	-4.88038	1.05881e-06	2.92051e-06	none
AL929472.4	0.51853	0.24055	0.370502	0.649254	0.516174	0.607184	none
AL929472.2	0
INPP5B	1072.79	-0.517306	0.0552091	-9.36994	7.25739e-21	4.80763e-20	none
SNORA63	0.10239	0.0562308	0.987957	0.0569163	0.954612		none
RNU6-584P	1.16384	-0.653803	0.183863	-3.55593	0.000376646	0.000794165	none
SF3A3	5295.9	0.0880191	0.0452628	1.94462	0.0518204	0.0792478	none
RNU6-510P	5.50017	-0.183789	0.111199	-1.65279	0.0983744	0.142354	none
FHL3	1391.24	0.141715	0.0751437	1.88592	0.0593061	0.0897259	none
UTP11	1940.08	0.262878	0.0515742	5.09709	3.44923e-07	9.92712e-07	none
POU3F1	43.2905	0.476301	0.162692	2.92762	0.00341562	0.00634502	none
MIR3659HG	7.05364	-0.224971	0.183196	-1.22803	0.219434	0.291939	none
AL139158.1	0.140512	0.128819	0.95051	0.135527	0.892196		none
MIR3659	0.0536708	-0.211045	1.54079	-0.136972	0.891053		none
LINC02786	0.278026	0.320669	0.533025	0.601602	0.547439	0.636448	none
AL390839.1	0.193449	0.344836	0.730964	0.471755	0.637101	0.717006	none
AL390839.2	0.275551	0.273868	0.448943	0.610028	0.541843	0.6314	none
LINC01343	0.475944	0.35928	0.38208	0.940328	0.347049	0.435247	none
AL513479.1	0.0453616	-0.00897179	1.31129	-0.00684197	0.994541		none
RNU6-753P	0.0155046	0.00240515	3.62609	0.000663291	0.999471		none
LINC01685	0.434221	0.38552	0.44958	0.857512	0.391162	0.481771	none
HSPA5P1	12.3828	0.921829	0.0934499	9.86442	5.93751e-23	4.35816e-22	none
AL354702.1	0.311905	0.65408	0.662622	0.987109	0.323589	0.410114	none
RRAGC	1529.32	-0.427102	0.0510632	-8.36419	6.05299e-17	3.29195e-16	none
AL139260.2	0
AL139260.1	30.3181	-1.63602	0.0788762	-20.7416	1.45985e-95	1.16216e-93	down
MYCBP	1740.18	0.65834	0.0513484	12.8211	1.2499e-37	1.71638e-36	none
AL139260.3	1.88958	0.821872	0.186232	4.41316	1.01872e-05	2.55398e-05	none
GJA9	1.03396	0.0475139	0.196705	0.241549	0.809129	0.855662	none
RHBDL2	245.501	1.06048	0.108122	9.80814	1.03862e-22	7.5225e-22	up
RNU6-605P	0.108072	0.226163	0.729689	0.309944	0.756603		none
EIF1P2	0.139857	0.00711322	0.686983	0.0103543	0.991739		none
AKIRIN1	3575.21	-0.0867696	0.0506382	-1.71352	0.0866167	0.126729	none
NDUFS5	7157.32	0.427003	0.0779716	5.47639	4.34079e-08	1.3475e-07	none
MACF1	19929.6	-0.3126	0.0741142	-4.21782	2.4668e-05	5.92812e-05	none
RNU6-608P	0.645305	0.643085	0.599345	1.07298	0.28328	0.365455	none
RNA5SP44	1.21976	1.37598	0.573884	2.39767	0.0164998	0.0276486	up
AL442071.2	2.02634	1.49353	0.37854	3.9455	7.96341e-05	0.000181228	up
AL442071.1	1.0994	1.34173	0.467203	2.87183	0.00408104	0.00750105	up
HSPE1P8	1.94982	1.49255	0.286487	5.20984	1.89006e-07	5.56134e-07	up
BMP8A	633.336	2.73263	0.101411	26.9462	6.32496e-160	1.9764e-157	up
OXCT2P1	8.65727	-0.0398515	0.131398	-0.303288	0.76167	0.819185	none
PPIEL	184.385	-0.626473	0.109029	-5.74595	9.14047e-09	2.99514e-08	none
PABPC4	7272.65	0.0497357	0.0632795	0.785968	0.431886	0.52381	none
PABPC4-AS1	12.7839	0.0178676	0.137103	0.130322	0.896312	0.923369	none
SNORA55	0
HEYL	1128.6	0.917803	0.0896931	10.2327	1.41515e-24	1.12288e-23	none
AL035404.2	0.514641	0.682145	0.429057	1.58987	0.111864	0.159959	none
NT5C1A	1.63454	-0.787306	0.233675	-3.36923	0.000753784	0.0015309	none
HPCAL4	16.8306	1.02066	0.166571	6.12746	8.92913e-10	3.15719e-09	up
PPIE	2554.73	-0.0347707	0.0504783	-0.688826	0.490933	0.582762	none
AL035404.1	0.304585	0.514398	0.339589	1.51477	0.129831	0.182996	none
RNU7-121P	0.0167386	0.0201354	4.99129	0.00403412	0.996781		none
BMP8B	477.956	1.10828	0.128421	8.63005	6.13277e-18	3.50212e-17	up
OXCT2	10.0032	0.229542	0.149694	1.53341	0.125176	0.177092	none
BMP8B-AS1	0.936238	0.520691	0.311548	1.6713	0.0946624	0.137385	none
AL033527.2	5.31253	0.911449	0.186613	4.88416	1.03869e-06	2.86708e-06	none
AL033527.1	0.0442558	-0.0297152	1.89703	-0.015664	0.987502		none
AL033527.3	8.35277	0.703552	0.175294	4.01356	5.98094e-05	0.000138061	none
LINC02811	0.843668	0.736703	0.2547	2.89243	0.0038227	0.00705368	none
TRIT1	1241.26	0.18406	0.0552105	3.33378	0.000856744	0.00172558	none
MYCL	572.656	0.92391	0.127633	7.23877	4.52763e-13	1.99226e-12	none
MYCL-AS1	1.42808	0.478657	0.196671	2.4338	0.0149412	0.0252273	none
MFSD2A	584.08	1.00353	0.149046	6.73305	1.66137e-11	6.60895e-11	up
AL663070.1	15.4299	0.40359	0.117341	3.43947	0.000582851	0.00120024	none
CAP1	22149.9	0.297984	0.0461223	6.46073	1.04198e-10	3.92637e-10	none
PPT1	17435.5	0.717188	0.0679469	10.5551	4.81003e-26	4.07045e-25	none
OAZ1P1	102.227	1.44647	0.331159	4.3679	1.25447e-05	3.11055e-05	up
RLF	1920.3	-0.27589	0.0585381	-4.713	2.44098e-06	6.50749e-06	none
RNU6-1237P	0.536467	0.502628	0.560888	0.89613	0.370184	0.459518	none
TMCO2	1.15926	0.554475	0.223711	2.47853	0.0131924	0.0224662	none
AL050341.2	371.667	-0.220437	0.0610796	-3.60901	0.000307365	0.000654544	none
ZMPSTE24	5994.3	0.548174	0.0496177	11.048	2.24264e-28	2.10489e-27	none
AL050341.1	0.75587	0.176308	0.283038	0.622915	0.53334	0.623307	none
COL9A2	1718.69	0.817655	0.150514	5.43241	5.55974e-08	1.70949e-07	none
AL031985.2	3.28287	-0.426405	0.136161	-3.13163	0.0017384	0.00336784	none
SMAP2	3513.5	0.285358	0.0565341	5.04754	4.47543e-07	1.27496e-06	none
AL031985.1	0.546341	0.884783	0.3219	2.74862	0.00598459	0.0107369	none
AL031985.4	1.7076	1.4187	0.249066	5.69607	1.22603e-08	3.97719e-08	up
ZFP69B	174.802	0.966648	0.0845041	11.4391	2.66743e-30	2.7234e-29	none
AL031985.3	254.256	1.20735	0.0763214	15.8192	2.29246e-56	5.91915e-55	up
AL603839.4	13.1089	1.6057	0.133955	11.9868	4.16676e-33	4.77416e-32	up
ZFP69	357.554	0.399797	0.0536676	7.44951	9.36899e-14	4.27746e-13	none
AL603839.3	28.0954	0.124744	0.0986089	1.26503	0.20586	0.275941	none
EXO5	241.93	0.493095	0.0560628	8.7954	1.4254e-18	8.39845e-18	none
AL603839.1	0.0655417	0.0562314	0.855145	0.0657565	0.947572		none
AL603839.2	20.4249	0.208222	0.0765229	2.72104	0.00650773	0.0116119	none
ZNF684	179.154	-0.218519	0.0475979	-4.59094	4.4126e-06	1.14955e-05	none
AL356379.2	0.411848	0.50215	0.290245	1.73009	0.0836141	0.122715	none
AL356379.1	0.149468	0.261357	0.576472	0.453373	0.65028		none
GTF2F2P2	0.103451	-0.129507	0.859685	-0.150644	0.880256		none
RIMS3	473.299	-1.43358	0.11659	-12.2959	9.53132e-35	1.17156e-33	down
AL031289.2	2.18484	-0.567905	0.176836	-3.21147	0.00132057	0.00259805	none
AL031289.1	4.54259	-0.148874	0.109901	-1.35462	0.175538	0.239611	none
NFYC-AS1	43.7093	-0.0904938	0.0871881	-1.03791	0.29931	0.383255	none
NFYC	2951.86	0.107043	0.0455216	2.35148	0.0186988	0.0310401	none
MIR30E	0.239986	-0.0556248	0.97608	-0.0569879	0.954555	0.966591	none
MIR30C1	0.237676	-0.507084	0.515143	-0.984356	0.32494	0.411576	none
KCNQ4	195.184	-0.331219	0.171214	-1.93453	0.0530483	0.0809754	none
RN7SL326P	0.26848	0.328023	0.767426	0.427432	0.669065	0.743974	none
CITED4	2953.49	0.45504	0.154482	2.94558	0.00322345	0.00600893	none
AC119677.1	0.568023	0.396599	0.299544	1.32401	0.1855	0.25158	none
AL391730.1	0.222551	-0.0563005	0.478167	-0.117742	0.906272	0.931249	none
AL391730.2	1.80057	-0.398098	0.260767	-1.52664	0.12685	0.179261	none
UBE2V1P8	0.0308366	0.0798079	2.01622	0.039583	0.968426		none
CTPS1	2204.01	1.33887	0.0853631	15.6844	1.93274e-55	4.8619e-54	up
SLFNL1-AS1	46.8433	0.348671	0.107364	3.24755	0.00116402	0.00230814	none
SLFNL1	30.2543	0.711376	0.125903	5.6502	1.60258e-08	5.15098e-08	none
SCMH1	2533.34	-0.310707	0.0517722	-6.00143	1.95593e-09	6.73794e-09	none
RPL23AP17	1.94781	1.9607	0.470442	4.16779	3.07573e-05	7.32176e-05	up
AC093151.7	1.5003	0.646931	0.277104	2.33461	0.0195637	0.0323647	none
AC093151.2	4.86815	0.1213	0.165217	0.734184	0.462836	0.555089	none
AC093151.1	0.235847	0.179731	0.469477	0.382832	0.701844	0.771367	none
AC093151.5	0.960753	-2.41807	0.276581	-8.74274	2.27518e-18	1.3281e-17	down
FOXO6	371.025	1.68294	0.102715	16.3845	2.46819e-60	7.0726e-59	up
FOXO6-AS1	12.738	0.417136	0.1385	3.01181	0.00259696	0.00490295	none
RNA5SP45	0.0506741	0.052465	1.57616	0.0332866	0.973446		none
EDN2	423.05	2.53087	0.168728	14.9997	7.37474e-51	1.61464e-49	up
HIVEP3	1860.93	-0.0848841	0.0708266	-1.19848	0.230731	0.305263	none
AL445933.2	4.77751	0.588858	0.217022	2.71335	0.00666062	0.0118576	none
AL445933.1	145.762	0.749528	0.114077	6.57038	5.0187e-11	1.9338e-10	none
AC119676.1	0
AL158216.1	0.833264	1.13005	0.26755	4.22371	2.40311e-05	5.78445e-05	up
HNRNPFP1	0.185402	0.0381478	0.403666	0.0945033	0.924709	0.945436	none
AC114492.1	0.0619288	0.0754055	1.75194	0.0430411	0.965669		none
GUCA2B	0.109438	0.280213	1.08318	0.258695	0.79587		none
GUCA2A	0.420686	0.445935	0.334465	1.33328	0.18244	0.247935	none
FOXJ3	4482.21	-0.258433	0.0448416	-5.76326	8.25058e-09	2.71477e-08	none
AC096540.1	15.8796	-0.79212	0.0887681	-8.92347	4.51885e-19	2.72329e-18	none
RIMKLA	367.054	1.43142	0.147947	9.67528	3.84053e-22	2.70444e-21	up
AL513331.1	0.619624	0.532797	0.246373	2.16256	0.0305747	0.0489446	none
ZMYND12	209.917	0.225097	0.0966489	2.32902	0.019858	0.032809	none
PPCS	3851.83	0.344537	0.0470711	7.31951	2.48874e-13	1.11182e-12	none
CCDC30	525.326	0.320244	0.0874307	3.66283	0.000249448	0.000537007	none
RPS3AP11	0.877938	0.12604	0.239399	0.526484	0.598552	0.682858	none
TMSB4XP1	7.5168	0.191954	0.113203	1.69566	0.0899494	0.131174	none
RNU6-536P	0.383959	-0.0437617	0.509119	-0.0859558	0.931502	0.950181	none
AL445669.1	1.2649	-0.0479128	0.204874	-0.233865	0.81509	0.860302	none
PPIH	1069.57	0.582927	0.0595629	9.78676	1.28347e-22	9.23626e-22	none
AC098484.4	85.902	-0.159939	0.0866951	-1.84484	0.0650608	0.0976176	none
AC098484.2	3.67024	0.188921	0.130117	1.45193	0.14652	0.20404	none
YBX1	19787.1	-0.0687554	0.0824613	-0.83379	0.404399	0.495563	none
CLDN19	83.6232	-3.48215	0.236477	-14.7251	4.44601e-49	9.17444e-48	down
P3H1	2774.06	0.842677	0.0772766	10.9047	1.09476e-27	9.96958e-27	none
C1orf50	150.849	-0.704986	0.0649076	-10.8614	1.76073e-27	1.58801e-26	none
AC098484.3	0.0924709	0.00853572	0.637991	0.0133791	0.989325		none
AC098484.1	0
TMEM269	31.3681	0.185538	0.0925958	2.00374	0.0450978	0.0698541	none
SVBP	559.962	-0.140515	0.0628983	-2.234	0.0254828	0.0413278	none
ERMAP	745.576	-0.579045	0.0534092	-10.8417	2.18479e-27	1.95588e-26	none
AL512353.1	68.6248	-0.169963	0.0886886	-1.91641	0.0553135	0.0841175	none
ZNF691	743.3	0.337729	0.0471019	7.17017	7.49037e-13	3.25386e-12	none
AL512353.2	1.0549	1.50985	0.291193	5.18507	2.15933e-07	6.32138e-07	up
MKRN8P	0.529733	1.11251	0.321239	3.46318	0.000533836	0.00110456	up
ATP6V1E1P1	1.06313	0.4616	0.225029	2.05129	0.0402388	0.0629862	none
SLC2A1	6907.26	1.52345	0.10335	14.7407	3.531e-49	7.31917e-48	up
ATP6V0CP4	2.13614	1.87633	0.295624	6.34701	2.19535e-10	8.1036e-10	up
SLC2A1-AS1	41.3217	0.612792	0.111931	5.47474	4.38158e-08	1.35952e-07	none
AC099795.1	3.11237	1.19182	0.232841	5.11863	3.07763e-07	8.89218e-07	up
RNU6-880P	0.538702	0.649861	0.285455	2.27658	0.0228112	0.0373032	none
AL161637.1	0.143356	0.245525	0.635648	0.386259	0.699305		none
FAM183A	78.6864	1.5543	0.158914	9.78079	1.3615e-22	9.78394e-22	up
EBNA1BP2	3871.57	0.809972	0.055633	14.5592	5.10461e-48	1.01111e-46	none
MIR6733	0
CFAP57	137.665	1.10233	0.140544	7.84335	4.38698e-15	2.17029e-14	up
RNA5SP46	0.361437	-0.356135	0.324299	-1.09817	0.272131	0.352845	none
TMEM125	1460.17	1.16498	0.0907208	12.8413	9.61941e-38	1.3285e-36	up
C1orf210	814.193	0.592425	0.0820511	7.22019	5.19153e-13	2.27719e-12	none
TIE1	1718.89	-1.18716	0.0831313	-14.2805	2.89388e-46	5.39042e-45	down
MPL	52.1126	-1.26576	0.0785835	-16.1072	2.27026e-58	6.19989e-57	down
AL139289.2	1.50046	0.194357	0.194056	1.00155	0.31656	0.402449	none
AL139289.1	59.5798	-0.20739	0.110672	-1.87392	0.060942	0.0919223	none
CDC20	2283.35	3.54428	0.130004	27.2629	1.16917e-163	3.92004e-161	up
ELOVL1	5403.24	0.334812	0.0552263	6.06255	1.33979e-09	4.67287e-09	none
MIR6734	0
MED8	1914.92	0.419212	0.0472087	8.87998	6.6872e-19	4.00065e-18	none
MED8-AS1	22.5738	0.270071	0.0951669	2.83787	0.00454162	0.00828724	none
SZT2	2316.13	-0.456259	0.0545241	-8.36803	5.85915e-17	3.18804e-16	none
SZT2-AS1	0.0292445	0.0131838	2.13908	0.00616329	0.995082		none
MIR6735	0
HYI	0
HYI-AS1	2.02734	-0.101816	0.174438	-0.583676	0.559438	0.647208	none
PTPRF	41087.2	0.095457	0.0665083	1.43526	0.151212	0.209924	none
KDM4A	1429.02	0.353448	0.0456044	7.75031	9.1668e-15	4.45999e-14	none
AL451062.2	0
KDM4A-AS1	81.6704	0.398777	0.0923504	4.31809	1.57386e-05	3.86308e-05	none
ST3GAL3	88.3723	0.447264	0.112552	3.97384	7.07226e-05	0.000161701	none
ST3GAL3-AS1	1.07798	-0.386374	0.332765	-1.1611	0.245601	0.322548	none
AL451062.1	1.06937	1.22441	0.523423	2.33924	0.019323	0.0320023	up
MIR6079	0
SHMT1P1	2.15654	1.06765	0.376598	2.83499	0.00458272	0.00835561	up
ARTN	266.5	3.21034	0.154489	20.7805	6.50395e-96	5.21383e-94	up
AL357079.1	74.2016	0.300974	0.082306	3.65677	0.000255415	0.000549134	none
AL357079.3	26.2605	0.26593	0.0832621	3.19389	0.00140371	0.00275217	none
IPO13	2811.06	0.464389	0.0440182	10.5499	5.08375e-26	4.29812e-25	none
AL357079.2	4.74692	1.6937	0.157734	10.7377	6.77231e-27	5.94797e-26	up
DPH2	1439.53	0.614	0.0589062	10.4233	1.94004e-25	1.59932e-24	none
ATP6V0B	8261.34	1.37026	0.0666281	20.5658	5.55606e-94	4.28928e-92	up
B4GALT2	3799.54	0.604895	0.0646883	9.35091	8.6898e-21	5.73502e-20	none
CCDC24	972.306	1.24323	0.0916316	13.5677	6.22673e-42	9.92086e-41	up
SLC6A9	1646.11	1.56792	0.117455	13.3491	1.19926e-40	1.82952e-39	up
AL139220.2	114.499	1.46221	0.157988	9.25524	2.13756e-20	1.38116e-19	up
AL139220.1	1.86233	1.17197	0.383148	3.05879	0.00222234	0.00424047	up
KRT8P47	0.0159709	0.0512882	2.3202	0.0221051	0.982364		none
RN7SL479P	0.207254	0.542374	1.19212	0.454967	0.649133	0.727304	none
KLF17	14.4404	1.64381	0.230718	7.12475	1.04273e-12	4.48932e-12	up
AL356653.1	2.78777	1.267	0.166909	7.59099	3.17459e-14	1.49148e-13	up
KLF18	0.170985	0.381403	0.812221	0.46958	0.638655	0.718386	none
AL359839.1	0.0839673	-0.156212	1.06628	-0.146502	0.883525		none
OOSP1P1	0.0363736	0.0261476	1.95365	0.013384	0.989321		none
AL035417.1	0.0104642	0.0175583	4.254	0.00412747	0.996707		none
AL035417.2	0.987747	-0.334457	0.223803	-1.49443	0.135064	0.18955	none
DMAP1	1979.73	-0.0206383	0.0580867	-0.355302	0.722363	0.788008	none
ERI3	3258.28	0.492187	0.0528239	9.31752	1.19093e-20	7.81156e-20	none
ERI3-IT1	8.4238	0.286146	0.189789	1.50771	0.131629	0.185284	none
RNU6-369P	0.0121108	0.0175437	4.96152	0.00353596	0.997179		none
RNF220	2473.39	0.205918	0.0486301	4.23438	2.29181e-05	5.52986e-05	none
MIR5584	0.0151844	-0.0335069	4.14422	-0.0080852	0.993549		none
TMEM53	467.68	-0.106334	0.063021	-1.68727	0.0915511	0.133299	none
ARMH1	109.363	0.750214	0.10866	6.90424	5.0474e-12	2.08103e-11	none
RNU5F-1	2.15722	0.187395	0.203336	0.921602	0.356736	0.445528	none
RNU5D-1	1.6773	1.08313	0.402487	2.69109	0.00712188	0.0126308	up
KIF2C	1440.74	3.32767	0.117997	28.2013	5.63761e-175	2.61574e-172	up
AL592166.1	3.76408	0.980129	0.152565	6.42433	1.32453e-10	4.95851e-10	none
RPS8	55703	-0.147323	0.0710218	-2.07433	0.0380488	0.0598621	none
SNORD55	0
SNORD46	6.33458	0.782468	0.14681	5.3298	9.83184e-08	2.96161e-07	none
SNORD38A	0.109471	0.111453	0.654312	0.170337	0.864745		none
SNORD38B	0
RPS15AP11	7.86127	-0.237251	0.105508	-2.24865	0.024535	0.0399033	none
BEST4	36.5918	0.295683	0.134809	2.19334	0.0282826	0.0455405	none
PLK3	996.136	-0.768799	0.0754441	-10.1903	2.19049e-24	1.72026e-23	none
TCTEX1D4	23.7969	-6.21522e-05	0.120931	-0.000513949	0.99959	0.999633	none
BTBD19	254.965	-0.30127	0.0873303	-3.44978	0.000561042	0.00115751	none
PTCH2	207.24	-1.29988	0.109619	-11.8582	1.95181e-32	2.17028e-31	down
RNU5E-6P	0
AL136380.1	6.38182	0.131112	0.129661	1.01119	0.311924	0.397468	none
EIF2B3	1702.23	-0.300386	0.0481321	-6.24087	4.35154e-10	1.57215e-09	none
RNA5SP47	0.327988	0.436099	0.569402	0.765891	0.443741	0.535812	none
CCNB1IP1P1	0.313847	0.389133	0.542234	0.717649	0.472974	0.565314	none
PPIAP35	3.75641	0.635966	0.153546	4.14184	3.44524e-05	8.15573e-05	none
MRPS17P1	6.13892	0.490779	0.172097	2.85177	0.00434768	0.00795833	none
HECTD3	3609.25	-0.241738	0.0448395	-5.39119	6.99934e-08	2.13414e-07	none
UROD	3207.47	-0.25807	0.0543234	-4.75063	2.02786e-06	5.45147e-06	none
ZSWIM5	425.179	0.105659	0.123819	0.853334	0.393474	0.484112	none
OSTCP5	0.315683	0.205156	0.30217	0.678942	0.497174	0.588891	none
LINC01144	92.1718	0.169784	0.0912118	1.86143	0.0626836	0.0943324	none
HPDL	143.894	1.91861	0.185742	10.3294	5.1864e-25	4.18833e-24	up
MUTYH	30.6977	0.157826	0.0827603	1.90703	0.0565168	0.0858197	none
AL451136.1	0
TOE1	652.974	0.0923872	0.0489316	1.88809	0.0590139	0.089319	none
TESK2	668.637	0.137835	0.0904414	1.52402	0.127503	0.180052	none
PPIAP36	1.82705	0.908437	0.230024	3.94931	7.83752e-05	0.000178461	none
CCDC163	217.527	0.320969	0.0869871	3.68984	0.000224393	0.000485848	none
MMACHC	705.79	0.203302	0.0607891	3.34438	0.00082466	0.00166498	none
PRDX1	14744.7	0.948865	0.0666063	14.2459	4.75606e-46	8.79488e-45	none
HMGB1P48	0.101546	0.24392	0.785949	0.310351	0.756294		none
AKR1A1	7122.07	0.571426	0.0580399	9.84539	7.17576e-23	5.24108e-22	none
AL355480.3	1.50127	-0.0917838	0.149484	-0.614003	0.539213	0.628988	none
AL355480.1	2.79114	0.175934	0.140663	1.25075	0.211026	0.281904	none
NASP	6113.5	0.454348	0.0660908	6.8746	6.21638e-12	2.54722e-11	none
AL355480.2	0.330913	0.644056	0.303703	2.12067	0.0339492	0.0538716	none
AL355480.4	0.235797	0.0649599	0.368424	0.176318	0.860044	0.89506	none
CCDC17	62.0829	-0.0519876	0.108957	-0.47714	0.633263	0.713753	none
GPBP1L1	8175.53	0.023221	0.0372659	0.623117	0.533208	0.623199	none
RPS15AP10	14.2152	0.305028	0.122089	2.49841	0.0124754	0.0213321	none
AL604028.2	23.9827	0.0821843	0.108488	0.757542	0.448725	0.54099	none
TMEM69	1709.7	0.276593	0.0447335	6.18313	6.28424e-10	2.24376e-09	none
IPP	1037.65	-0.0297034	0.0539705	-0.550363	0.58207	0.667803	none
AL604028.1	129.176	0.0842675	0.0586668	1.43637	0.150896	0.209568	none
AL603882.1	4.23662	-0.56164	0.111506	-5.03686	4.73229e-07	1.34563e-06	none
MAST2	4817.92	0.598035	0.0534208	11.1948	4.32457e-29	4.18993e-28	none
TMA16P2	1.5534	2.33093	0.39897	5.84237	5.14646e-09	1.72038e-08	up
PIK3R3	6815.88	0.812604	0.0773315	10.5081	7.93036e-26	6.63642e-25	none
P3R3URF-PIK3R3	0
AL358075.1	8.14896	1.72242	0.167187	10.3024	6.87538e-25	5.52412e-24	up
AL358075.3	0.920768	1.63094	0.420458	3.87895	0.000104906	0.000235682	up
AL358075.2	17.3625	2.16584	0.144349	15.0041	6.89793e-51	1.5132e-49	up
TSPAN1	5655.04	2.46167	0.179741	13.6956	1.07796e-42	1.76967e-41	up
P3R3URF	0.0589663	0.096539	1.143	0.0844614	0.93269		none
POMGNT1	4931.23	0.391767	0.0515152	7.60489	2.8514e-14	1.34389e-13	none
LURAP1	37.8167	-1.47272	0.0967537	-15.2213	2.5542e-52	5.8633e-51	down
RAD54L	299.064	2.64911	0.114052	23.2272	2.41722e-119	3.3144e-117	up
LRRC41	5762.79	0.218381	0.0420339	5.19535	2.04331e-07	5.99614e-07	none
UQCRH	5782.59	0.413617	0.0740213	5.58781	2.29951e-08	7.30468e-08	none
NSUN4	1858.01	0.119789	0.0392541	3.05164	0.00227594	0.00433608	none
AL122001.1	1.32349	-0.505061	0.260623	-1.9379	0.0526356	0.0803885	none
FAAH	2059.91	0.980043	0.0914789	10.7133	8.81425e-27	7.70601e-26	none
FAAHP1	70.6659	0.740513	0.14316	5.17264	2.30804e-07	6.74369e-07	none
LINC01398	3.41317	0.23457	0.18597	1.26133	0.207188	0.277479	none
DMBX1	55.1826	3.15533	0.194904	16.1892	6.01479e-59	1.66436e-57	up
TMEM275	0.160979	0.346446	0.564843	0.61335	0.539645		none
MKNK1-AS1	15.0373	-0.371686	0.1103	-3.36977	0.0007523	0.00152809	none
KNCN	1.23693	2.46712	0.451217	5.46771	4.5589e-08	1.41244e-07	up
MKNK1	1337.86	-0.306461	0.0419195	-7.3107	2.65762e-13	1.18588e-12	none
MOB3C	1140.73	-0.865334	0.0484918	-17.845	3.16319e-71	1.2881e-69	none
ATPAF1	3598.4	-0.230041	0.0489033	-4.70399	2.55121e-06	6.79109e-06	none
NENFP1	0.829458	-0.349773	0.327474	-1.06809	0.285478	0.367903	none
TEX38	7.85566	-0.0209973	0.119357	-0.175921	0.860356	0.895304	none
EFCAB14-AS1	0.283684	0.207253	0.80876	0.25626	0.79775	0.847276	none
EFCAB14	10034.7	-0.502845	0.0463189	-10.8561	1.86456e-27	1.67902e-26	none
AL593856.1	0.269739	-0.0483474	0.392361	-0.123222	0.901932	0.927744	none
CYP4B1	1736.02	-0.0836503	0.207415	-0.403299	0.686728	0.759003	none
CYP4Z2P	623.679	1.18257	0.229522	5.15232	2.5729e-07	7.48375e-07	up
TUBAP8	9.7949	1.39474	0.279269	4.99426	5.90629e-07	1.66554e-06	up
CYP4A11	18.8726	-0.266789	0.226806	-1.17628	0.239481	0.315512	none
CYP4A26P	0.141514	-0.288599	0.755059	-0.38222	0.702298		none
CYP4A43P	0.115413	0.0755488	0.790553	0.0955644	0.923867		none
CYP4A27P	0.20766	0.208866	0.846782	0.246659	0.805172	0.852743	none
CYP4A44P	0.117677	0.0781405	0.968279	0.0807004	0.93568		none
CYP4X1	3455.98	0.223723	0.199455	1.12167	0.262004	0.341318	none
CYP4Z1	4481.39	1.42448	0.285031	4.99763	5.804e-07	1.6376e-06	up
TUBAP9	22.5837	1.42	0.288066	4.92942	8.24736e-07	2.29597e-06	up
CYP4A22-AS1	16.4739	1.02036	0.12263	8.32058	8.75367e-17	4.71993e-16	up
CYP4A22	17.3304	0.867117	0.244332	3.54893	0.000386798	0.000814261	none
MTND1P34	0.601232	1.08326	0.477162	2.27021	0.0231947	0.0378898	up
LINC00853	51.6876	1.04803	0.112971	9.27703	1.74271e-20	1.13225e-19	up
PDZK1IP1	1981.64	0.786619	0.181566	4.33243	1.47476e-05	3.6305e-05	none
TAL1	195.935	-1.95023	0.0963555	-20.24	4.35555e-91	3.14078e-89	down
AL135960.1	9.14815	-2.17377	0.137051	-15.861	1.17907e-56	3.06679e-55	down
STIL	1026.76	2.10945	0.0980505	21.5139	1.1532e-102	1.10357e-100	up
CMPK1	9333.04	-0.356152	0.0509704	-6.98742	2.79991e-12	1.17357e-11	none
LINC01389	22.9135	0.951631	0.134895	7.05463	1.73057e-12	7.34608e-12	none
FOXE3	3.67696	1.51215	0.239903	6.30319	2.91587e-10	1.06697e-09	up
FOXD2-AS1	164.22	0.881875	0.102171	8.63134	6.06383e-18	3.46352e-17	none
FOXD2	123.824	2.00856	0.138375	14.5154	9.68608e-48	1.89893e-46	up
AL356458.1	0.0701508	0.196474	1.08108	0.181739	0.855787		none
RPL21P24	0.0858046	0.0177341	1.02683	0.0172706	0.986221		none
ATP6V0E1P4	0.0808518	0.0947273	1.01725	0.0931205	0.925808		none
LINC01738	1.45855	0.306933	0.271383	1.131	0.258056	0.336749	none
TRABD2B	361.101	-1.71858	0.146036	-11.7682	5.69484e-32	6.20462e-31	down
AL691459.1	0
AC096541.1	5.66609	-1.31156	0.17331	-7.56772	3.79841e-14	1.77439e-13	down
LINC02794	1.48939	-1.82	0.219588	-8.28823	1.14949e-16	6.16181e-16	down
AL356289.1	0.14505	-0.051733	0.728619	-0.0710015	0.943397		none
CYP46A4P	0.114322	-0.631353	0.744602	-0.847907	0.39649		none
SKINT1L	9.60078	-0.368442	0.176632	-2.08592	0.0369855	0.058299	none
AL356289.2	1.28275	-0.15634	0.285174	-0.548228	0.583535	0.669083	none
AL109659.1	1.64333	-0.731108	0.234863	-3.11291	0.00185253	0.00357404	none
SLC5A9	53.4256	-0.90393	0.132214	-6.83687	8.09449e-12	3.29125e-11	none
AL109659.2	11.5217	-1.09945	0.137453	-7.99874	1.25698e-15	6.4118e-15	down
AL109659.3	2.40632	0.673836	0.188726	3.57046	0.000356359	0.00075381	none
SPATA6	985.513	-0.360434	0.0759893	-4.74322	2.10348e-06	5.64477e-06	none
PPP1R8P1	3.45005	0.736325	0.194683	3.78216	0.000155472	0.000342581	none
RNU6-723P	0.298375	0.326418	1.08718	0.300242	0.763992	0.821029	none
AL356968.2	7.4391	-0.629796	0.12897	-4.88329	1.04331e-06	2.87949e-06	none
RNU4-61P	0.146754	0.285789	0.765562	0.373306	0.708921		none
AL356968.1	0.0747315	0.0813746	1.10957	0.0733387	0.941537		none
AGBL4	61.5703	0.595206	0.1257	4.73514	2.18908e-06	5.86488e-06	none
AL391844.1	1.06955	0.227193	0.316424	0.718	0.472757	0.565084	none
BEND5	197.681	-0.91713	0.105124	-8.72428	2.67877e-18	1.55854e-17	none
AL645507.1	0.419296	0.62536	0.665572	0.939582	0.347432	0.43568	none
AC099788.1	0.862703	1.43316	0.58083	2.46744	0.0136082	0.0231255	up
AGBL4-AS1	0.2611	0.385008	0.894412	0.430459	0.666862	0.742015	none
AGBL4-IT1	1.3328	2.41594	0.514975	4.69138	2.7137e-06	7.20569e-06	up
AL390023.1	0.472354	0.879714	0.541578	1.62435	0.1043	0.150092	none
ZNF859P	1.08185	1.75374	0.591691	2.96394	0.00303726	0.00568237	up
AL645730.1	1.02099	1.24138	0.628445	1.97531	0.0482326	0.0742739	none
MTND2P29	0.615897	0.447231	0.449459	0.995043	0.319715	0.40582	none
ELAVL4	26.584	0.57592	0.141688	4.0647	4.80936e-05	0.000112104	none
AL583843.1	0.0713798	0.065818	1.45438	0.045255	0.963904		none
ELAVL4-AS1	0.135015	0.0015375	0.94364	0.00162933	0.9987		none
AL592182.1	0.0326508	0.0309267	3.29479	0.00938657	0.992511		none
LINC02808	0.180559	0.0684529	0.558581	0.122548	0.902465	0.928168	none
AL592182.2	0.12449	0.20361	0.894495	0.227626	0.819937		none
AL596275.1	3.91629	0.314517	0.133138	2.36233	0.0181604	0.0302086	none
HMGB1P45	0.211322	0.389135	0.494087	0.787584	0.43094	0.5228	none
FCF1P6	0.171659	0.152484	0.523681	0.291178	0.770916	0.826381	none
DMRTA2	9.2453	2.71803	0.332339	8.17849	2.87418e-16	1.51437e-15	up
AL049637.1	0.574934	1.29701	0.535768	2.42085	0.0154842	0.0260771	up
FAF1	3411.74	0.00137281	0.0468765	0.0292856	0.976637	0.98295	none
FAF1-AS1	2.9995	0.649827	0.273433	2.37655	0.0174754	0.0291366	none
RNU6-1026P	0.318648	0.360325	0.801286	0.449684	0.652938	0.73048	none
PHBP12	5.82532	0.616048	0.189479	3.25128	0.00114887	0.00227998	none
MRPS6P2	1.00998	1.484	0.583047	2.54524	0.0109202	0.0188376	up
CDKN2C	1266.24	-1.33388	0.0939723	-14.1944	9.91735e-46	1.82217e-44	down
MIR4421	0.205851	-2.48055	0.538753	-4.60426	4.13943e-06	1.08065e-05	down
MIR6500	0.250951	-2.77297	0.461135	-6.01336	1.8172e-09	6.27461e-09	down
C1orf185	0.583453	-2.51968	0.316353	-7.96478	1.65515e-15	8.38138e-15	down
CFL1P2	3.16908	0.429922	0.130771	3.28759	0.0010105	0.00201757	none
LINC01562	3.9283	-0.970967	0.132314	-7.33833	2.16274e-13	9.69109e-13	none
RNF11	6707.45	-0.461917	0.0505975	-9.12925	6.8976e-20	4.33367e-19	none
AL162430.1	13.7941	0.266782	0.100905	2.64388	0.00819606	0.0144184	none
AL162430.2	6.66313	0.117974	0.156839	0.752196	0.451933	0.544247	none
TTC39A	7317.31	1.40718	0.120578	11.6703	1.80741e-31	1.93164e-30	up
TTC39A-AS1	65.5825	0.636669	0.137916	4.61634	3.90562e-06	1.02264e-05	none
EPS15	5049.44	-0.463375	0.0424709	-10.9104	1.02767e-27	9.37352e-27	none
AL671986.1	7.65864	1.07377	0.168448	6.37453	1.83529e-10	6.81394e-10	up
RNU6-877P	0.537252	0.426367	0.465975	0.914999	0.360192	0.449021	none
AC104170.1	4.68235	0.387239	0.153358	2.52506	0.0115679	0.0198885	none
EPS15-AS1	7.08032	0.227748	0.13515	1.68515	0.0919593	0.133834	none
RNU6-1281P	0.182898	0.204001	0.809778	0.251922	0.801102	0.849831	none
CALR4P	11.8477	1.16575	0.166696	6.99327	2.68549e-12	1.12664e-11	up
OSBPL9	5210.82	-0.522203	0.0519596	-10.0502	9.17082e-24	7.00569e-23	none
GAPDHP51	1.24794	1.1128	0.407632	2.7299	0.00633529	0.0113245	up
SLC25A6P3	0.810125	1.02293	0.602627	1.69745	0.0896119	0.130723	none
AL050343.1	0.599584	0.225003	0.491956	0.457364	0.64741	0.72578	none
NRDC	8223.59	0.155395	0.0427694	3.63332	0.000279801	0.000598564	none
AL050343.2	20.9738	-0.661739	0.103389	-6.40049	1.54884e-10	5.77752e-10	none
AL050343.3	1.11264	0.226672	0.289212	0.783758	0.433182	0.525118	none
MIR761	0.0236345	0.0616582	2.29247	0.026896	0.978543		none
TSEN15P2	2.02823	0.776569	0.305987	2.53791	0.0111516	0.019218	none
RAB3B	465.481	0.693028	0.186586	3.71425	0.000203807	0.000443177	none
RNA5SP48	0.075363	0.168738	0.99048	0.17036	0.864727		none
AL445685.2	0.734552	1.26769	0.490442	2.58479	0.00974387	0.016944	up
RN7SL290P	0.103014	0.226159	1.46953	0.153899	0.87769		none
TXNDC12	249.649	0.19555	0.0577691	3.38503	0.000711699	0.00145043	none
AL445685.3	0
KTI12	203.445	0.390929	0.056511	6.91775	4.58872e-12	1.89771e-11	none
AL445685.1	1.88749	0.325296	0.258903	1.25644	0.208956	0.27948	none
TXNDC12-AS1	2.3279	1.14954	0.241395	4.76208	1.91608e-06	5.16418e-06	up
BTF3L4	3800.63	0.348216	0.0446281	7.80262	6.06346e-15	2.97595e-14	none
ZFYVE9	1807.74	-0.751977	0.0758588	-9.91285	3.66058e-23	2.71377e-22	none
RN7SL788P	0.555225	0.831987	0.705643	1.17905	0.238379	0.314213	none
AL139156.2	7.94319	-0.538922	0.108272	-4.97748	6.44176e-07	1.80987e-06	none
AL139156.1	0.776695	0.955537	0.471696	2.02575	0.0427906	0.0665744	none
PDCL3P6	0.863819	0.718424	0.295687	2.42967	0.0151124	0.0254948	none
AL139156.3	0.387759	0.502627	0.68473	0.734051	0.462918	0.555169	none
DNAJC19P7	0.52731	0.571431	0.474597	1.20403	0.228576	0.302717	none
ANAPC10P1	1.05576	1.35541	0.395428	3.4277	0.000608724	0.00125044	up
CC2D1B	2077.09	0.0978893	0.0415773	2.35439	0.018553	0.030817	none
AL513218.1	3.4378	0.819052	0.151644	5.40115	6.62156e-08	2.02284e-07	none
AL513218.2	5.19073	0.0846187	0.12205	0.693311	0.488114	0.58027	none
PLA2G12AP1	8.90387	0.411559	0.091307	4.50742	6.5621e-06	1.67812e-05	none
ORC1	389.639	2.29328	0.115009	19.9399	1.83403e-88	1.23889e-86	up
PRPF38A	3298.09	-0.105673	0.041306	-2.55829	0.0105189	0.0181988	none
TUT4	1655.95	-0.671835	0.0933861	-7.19416	6.28455e-13	2.74275e-12	none
AL591167.1	0.718899	-0.0216009	0.358871	-0.0601912	0.952003	0.964566	none
EEF1GP7	0.704572	-0.689997	0.266113	-2.59288	0.0095177	0.0165703	none
GPX7	811.063	0.379685	0.102151	3.7169	0.00020168	0.000438864	none
SHISAL2A	44.2606	1.26469	0.122885	10.2917	7.68444e-25	6.16015e-24	up
COA7	1689.55	0.288623	0.0620156	4.65404	3.25492e-06	8.58324e-06	none
NDUFS5P3	0.284181	0.0960028	0.304022	0.315776	0.752173	0.811611	none
RN7SL62P	0.177383	0.360485	1.22548	0.294158	0.768637	0.824651	none
ZYG11B	2746.89	-0.62372	0.0546261	-11.418	3.39987e-30	3.46274e-29	none
RNU2-30P	0.166417	0.179312	0.707149	0.25357	0.799828	0.848964	none
RPS13P2	41.2213	-0.137443	0.101907	-1.3487	0.177433	0.241903	none
RNU6-969P	0.874281	0.187872	0.260857	0.720211	0.471395	0.563689	none
ZYG11A	324.713	1.52759	0.126835	12.0439	2.0883e-33	2.42723e-32	up
AC099677.3	1.59133	1.04449	0.233631	4.47067	7.79735e-06	1.9799e-05	up
ECHDC2	3516.51	-0.630506	0.0814879	-7.73742	1.01455e-14	4.92066e-14	none
AC099677.1	35.8077	-1.30307	0.144588	-9.01233	2.01729e-19	1.23748e-18	down
AC099677.2	0.530112	-1.93043	0.258103	-7.47929	7.47246e-14	3.43e-13	down
SCP2	8797.95	-0.326354	0.059192	-5.51348	3.51806e-08	1.10163e-07	none
AC099677.4	0.326158	0.18473	0.395616	0.466943	0.640541	0.720035	none
AC099677.6	0.0274319	0.079811	1.65729	0.0481574	0.961591		none
AC099677.5	0.130392	0.0825452	1.00473	0.0821565	0.934522		none
H3P2	0.448062	0.214468	0.492475	0.43549	0.663207	0.738801	none
RRAS2P1	4.44918	-1.0569	0.234307	-4.51076	6.4597e-06	1.65276e-05	down
TUBBP10	0.527454	-0.0305014	0.247052	-0.123461	0.901742	0.927569	none
PODN	3101.55	-1.24491	0.123492	-10.0809	6.71016e-24	5.15771e-23	down
AL445183.1	0.00244018	0.00198879	4.99129	0.000398453	0.999682		none
HIGD1AP11	0
SLC1A7	80.466	-1.78828	0.134766	-13.2695	3.4778e-40	5.20695e-39	down
AL445183.2	1.80512	-1.12146	0.19395	-5.78221	7.37242e-09	2.43524e-08	down
AL606760.4	0.24286	-0.561353	0.428448	-1.3102	0.190128	0.257121	none
CPT2	752.491	0.177718	0.048145	3.69131	0.000223106	0.000483129	none
AL606760.2	4.0532	-0.34103	0.0639334	-5.33414	9.59992e-08	2.89517e-07	none
CZIB	1760.93	-0.422775	0.0452854	-9.33578	1.00247e-20	6.60273e-20	none
AL606760.3	2.6342	0.437167	0.170698	2.56106	0.0104355	0.0180645	none
MAGOH	1617.92	0.585553	0.065853	8.89181	6.01205e-19	3.60378e-18	none
AL606760.1	43.5328	0.398278	0.0800595	4.97478	6.53221e-07	1.83439e-06	none
LRP8	624.545	1.63031	0.123299	13.2225	6.50883e-40	9.64441e-39	up
AL355483.3	0
AL355483.1	0.395415	0.570617	0.40606	1.40525	0.159946	0.22059	none
AL355483.2	0.925894	1.8147	0.442072	4.105	4.04317e-05	9.50455e-05	up
LINC01771	2.60943	1.37695	0.217137	6.34137	2.27738e-10	8.39762e-10	up
AC119428.2	3.99336	-0.142303	0.194538	-0.731494	0.464478	0.556781	none
AC119428.1	0.0367049	0.0187635	1.54919	0.0121118	0.990336		none
LINC02812	6.4746	-0.23474	0.177494	-1.32253	0.185993	0.252181	none
SLC25A3P1	0.225524	0.189689	0.567936	0.333998	0.738381	0.800833	none
AL365445.1	0.00442108	-0.0490776	4.99129	-0.00983266	0.992155		none
DMRTB1	0.43018	1.0181	0.626287	1.62561	0.104032	0.149753	none
GLIS1	65.2241	-0.384186	0.136485	-2.81487	0.00487971	0.00886297	none
RNU7-95P	0.105582	0.0528516	2.02217	0.026136	0.979149		none
NDC1	2997.14	0.652427	0.0650678	10.0269	1.16119e-23	8.82493e-23	none
AL049745.1	0.718481	0.79769	0.261666	3.0485	0.00229984	0.00437907	none
AL049745.2	0.188107	-0.00126593	0.398627	-0.00317572	0.997466	0.998172	none
YIPF1	3157.44	0.586679	0.0567473	10.3384	4.72126e-25	3.82278e-24	none
DIO1	694.288	3.52212	0.237027	14.8596	6.02994e-50	1.28053e-48	up
HSPB11	1250.78	0.730025	0.0611236	11.9434	7.02825e-33	7.97322e-32	none
LRRC42	2041.55	0.608463	0.0564279	10.783	4.14099e-27	3.66639e-26	none
HNRNPA3P12	10.8312	0.58205	0.0846314	6.87747	6.09246e-12	2.49778e-11	none
LDLRAD1	65.5446	1.82591	0.20872	8.74816	2.16862e-18	1.26751e-17	up
TMEM59	18898.6	0.0295212	0.0541578	0.545095	0.585688	0.671132	none
AL353898.3	23.2146	0.411782	0.0889681	4.62843	3.68452e-06	9.6667e-06	none
TCEANC2	882.922	-0.194378	0.0449084	-4.32833	1.50245e-05	3.69472e-05	none
MIR4781	0.00824301	0.0227555	3.53954	0.00642894	0.99487		none
AL353898.1	1.04318	1.04514	0.246211	4.24489	2.18696e-05	5.2877e-05	up
AL353898.2	0
AL357673.1	1.91594	-1.22677	0.149703	-8.19468	2.51263e-16	1.32768e-15	down
CDCP2	0.239909	-0.754273	0.388784	-1.94008	0.0523695	0.0800114	none
AL357673.2	2.49542	-0.66719	0.183376	-3.63838	0.000274361	0.00058783	none
CYB5RL	474.62	-0.157731	0.0591495	-2.66665	0.00766104	0.0135331	none
MRPL37	4632.11	0.526605	0.0625404	8.42024	3.75729e-17	2.06123e-16	none
SSBP3	4028.77	-0.12715	0.0617485	-2.05916	0.0394786	0.0618932	none
SSBP3-AS1	35.9435	-0.546798	0.0990958	-5.51787	3.43133e-08	1.07528e-07	none
AL161644.1	1.17311	1.61047	0.480785	3.34966	0.000809111	0.00163574	up
AL035415.1	0.0379297	-0.121872	1.80835	-0.0673938	0.946268		none
AC099796.2	0.109986	0.0958986	0.692533	0.138475	0.889865		none
LINC02784	0.0430393	0.052071	2.06041	0.0252722	0.979838		none
AC099796.1	0.0941122	0.0747688	0.753234	0.0992638	0.920929		none
HNRNPA1P63	0.58185	-0.0149271	0.232387	-0.0642336	0.948784	0.962424	none
ACOT11	143.238	0.165302	0.119057	1.38843	0.165007	0.226848	none
FAM151A	9.60857	-0.569823	0.142192	-4.00742	6.13853e-05	0.000141521	none
AL590093.1	0.635106	-0.478333	0.263848	-1.81291	0.0698461	0.104172	none
MROH7	11.5459	-1.01951	0.143825	-7.08852	1.35554e-12	5.79215e-12	down
MROH7-TTC4	0.375171	-0.317996	0.307171	-1.03524	0.300557	0.384638	none
TTC4	45.239	0.0132052	0.0587148	0.224904	0.822054	0.865425	none
PARS2	468.957	0.515346	0.0531717	9.69211	3.25742e-22	2.29982e-21	none
TTC22	705.709	0.318572	0.150162	2.12152	0.0338783	0.0537666	none
AC096536.1	2.26611	-0.668705	0.211217	-3.16596	0.00154573	0.00301313	none
LEXM	9.74263	0.365737	0.143251	2.55312	0.0106762	0.01845	none
DHCR24	40084.5	0.976835	0.0976437	10.0041	1.46257e-23	1.10623e-22	none
AC096536.3	2.10636	2.04837	0.331109	6.18638	6.15598e-10	2.19917e-09	up
AC096536.2	1.24127	1.70275	0.229143	7.43094	1.07831e-13	4.90795e-13	up
DHCR24-DT	17.0434	1.43416	0.113053	12.6858	7.09265e-37	9.46799e-36	up
AL590440.2	1.76519	-0.0731577	0.184581	-0.396344	0.691851	0.763159	none
TMEM61	39.4597	-0.0927272	0.157233	-0.589743	0.555363	0.643722	none
AL590440.1	0
BSND	6.91941	1.11271	0.204313	5.44612	5.14818e-08	1.58762e-07	up
PCSK9	83.9232	1.62943	0.195759	8.32368	8.52738e-17	4.60116e-16	up
USP24	5415.12	-0.226646	0.059351	-3.81873	0.000134139	0.000297818	none
MIR4422HG	1.31446	0.299267	0.251376	1.19052	0.233843	0.308935	none
GYG1P3	0.395347	0.187879	0.281335	0.667811	0.504254	0.595848	none
MIR4422	0.0263333	0.028346	2.36271	0.0119973	0.990428		none
AL603840.1	14.2257	-2.33763	0.223476	-10.4604	1.31351e-25	1.08849e-24	down
GOT2P1	0.0727796	0.104314	1.48345	0.0703187	0.94394		none
MTCO2P34	0.0311715	0.0538706	3.13514	0.0171828	0.986291		none
RN7SKP291	0.274608	0.667578	1.75383	0.380639	0.703471	0.772674	none
RNU6-830P	0.00701054	-0.0183597	4.99129	-0.00367834	0.997065		none
LINC01755	0.529756	-1.46527	0.349531	-4.19211	2.76366e-05	6.60799e-05	down
LINC01753	0.0967147	-0.0407223	1.11266	-0.0365989	0.970805		none
PIGQP1	0.0988472	0.125056	1.0654	0.117379	0.906559		none
AL353681.1	0.124172	-0.0654757	0.86978	-0.0752785	0.939993		none
AC119674.1	6.30885	-0.72703	0.179414	-4.05224	5.07295e-05	0.000117955	none
AC119674.2	3.98567	-0.494693	0.148386	-3.33382	0.000856628	0.00172543	none
RPSAP20	0.859835	-0.907368	0.237604	-3.81883	0.000134086	0.000297714	none
LINC01767	6.10046	-0.0291902	0.19141	-0.152501	0.878792	0.909523	none
PLPP3	3387.08	-1.92812	0.0731718	-26.3506	5.04842e-153	1.38859e-150	down
RPL21P23	1.13513	-0.37013	0.355767	-1.04037	0.298166	0.382036	none
RPL23AP85	0.561394	-0.525852	0.25803	-2.03795	0.0415549	0.0648452	none
AC099789.1	0.894509	0.312144	0.214571	1.45473	0.145744	0.203045	none
PRKAA2	1031.9	0.429091	0.157306	2.72775	0.0063767	0.0113918	none
FYB2	235.849	0.440239	0.188282	2.33819	0.0193776	0.0320869	none
AL360295.1	0.309194	0.217068	0.468707	0.463121	0.643277	0.722347	none
C8A	0.585019	1.09452	0.5338	2.05044	0.0403217	0.0630966	none
C8B	5.1783	-0.134713	0.334161	-0.403138	0.686847	0.759098	none
AL161740.1	0.086853	0.135817	0.865142	0.156988	0.875254		none
DAB1	78.8246	0.568766	0.19146	2.97068	0.00297144	0.00556626	none
AL390243.1	0.354074	0.544435	0.58281	0.934157	0.350223	0.438689	none
RPS20P5	0.299301	0.15847	0.319927	0.495332	0.620366	0.702233	none
DAB1-AS1	1.09161	1.55075	0.557491	2.78167	0.00540808	0.00976435	up
HNRNPA1P6	2.86364	0.0786979	0.121871	0.645749	0.518442	0.609352	none
RPS26P15	5.10107	-0.0734309	0.13265	-0.553568	0.579875	0.665932	none
AL445193.2	0.410883	0.287825	0.643707	0.447136	0.654777	0.732109	none
AL445193.1	0.114063	0.20425	1.37181	0.14889	0.88164		none
AL357373.1	0.529711	0.0281118	0.331589	0.0847791	0.932437	0.950797	none
OMA1	900.068	0.173142	0.053121	3.25939	0.00111651	0.00221863	none
AL035411.3	16.3878	0.134857	0.0954719	1.41253	0.157794	0.217962	none
AL035411.2	0.404938	-0.967639	0.303884	-3.18424	0.00145134	0.00284026	none
RN7SL713P	0.203082	0.280544	0.767694	0.365438	0.714785	0.781803	none
TACSTD2	19553.8	-0.0158006	0.112297	-0.140704	0.888104	0.91662	none
AL035411.1	13.8987	0.279452	0.0916697	3.04846	0.00230016	0.00437951	none
MYSM1	2357.99	-0.258134	0.0775162	-3.33007	0.000868247	0.00174753	none
AL136985.3	15.2621	-1.98466	0.129152	-15.3669	2.72927e-53	6.4126e-52	down
JUN	14506.9	-1.39776	0.10025	-13.9427	3.48321e-44	6.04678e-43	down
LINC01135	160.462	0.0453859	0.0960628	0.472461	0.636598	0.71658	none
AL136985.2	6.85025	0.492969	0.123977	3.97631	6.99919e-05	0.00016011	none
AL136985.1	0.51208	0.797759	0.449874	1.7733	0.0761796	0.112693	none
LINC02777	49.026	-0.0589939	0.0770312	-0.765844	0.443769	0.535817	none
LINC01358	30.8417	-0.287031	0.113789	-2.52247	0.0116533	0.0200217	none
PHBP3	1.20568	0.78782	0.212742	3.70317	0.000212919	0.000462094	none
AL592431.2	0.469475	0.154896	0.36714	0.421901	0.673097	0.747608	none
AL592431.1	0.741596	-0.551422	0.263227	-2.09485	0.0361844	0.0571323	none
HSD52	18.2895	-1.80906	0.102548	-17.6412	1.1898e-69	4.60424e-68	down
AC093424.1	2.29008	-1.28865	0.188539	-6.83492	8.2048e-12	3.33433e-11	down
FGGY	595.842	-0.182128	0.0648473	-2.80856	0.00497634	0.00902492	none
MIR4711	0.112037	-0.216076	0.842357	-0.256514	0.797554		none
AL035416.1	2.61218	-0.10385	0.187061	-0.555169	0.578779	0.665123	none
HOOK1	2800.56	0.706092	0.0856192	8.2469	1.62559e-16	8.66041e-16	none
CYP2J2	726.254	0.151302	0.136443	1.1089	0.267475	0.34747	none
RN7SL475P	0.0933009	0.220189	2.04765	0.107533	0.914366		none
C1orf87	2.66405	-0.0628185	0.377316	-0.166488	0.867773	0.901042	none
PGBD4P8	2.37483	2.02932	0.558251	3.63514	0.000277832	0.000594657	up
LINC02778	0.159879	0.0226671	0.931206	0.0243417	0.98058		none
LINC01748	14.0236	1.27308	0.283201	4.49531	6.94684e-06	1.77138e-05	up
AC099792.1	2.49824	-1.24378	0.236964	-5.2488	1.53095e-07	4.539e-07	down
NFIA	6274.41	-0.312253	0.109643	-2.8479	0.00440084	0.00804794	none
NFIA-AS2	26.0919	-0.692609	0.148536	-4.66289	3.11796e-06	8.23736e-06	none
NFIA-AS1	3.99954	1.37185	0.295106	4.64867	3.34075e-06	8.80048e-06	up
AC099791.3	1.17085	0.859249	0.322276	2.66619	0.0076717	0.0135515	none
AC099791.4	3.50094	1.0998	0.214684	5.12286	3.00933e-07	8.70197e-07	up
AC099791.1	0.599952	0.468393	0.295426	1.58548	0.112857	0.161218	none
TM2D1	1459.38	0.0518824	0.0497825	1.04218	0.297328	0.3811	none
AC099791.2	3.53877	0.639998	0.178006	3.59537	0.000323932	0.000688091	none
PATJ	6579.77	0.413603	0.0822145	5.03078	4.88482e-07	1.38686e-06	none
RNU6-414P	0.984936	1.52728	0.549338	2.78022	0.00543226	0.00980339	up
RNU6-1177P	1.27857	2.37858	0.488516	4.86898	1.12175e-06	3.08652e-06	up
LAMTOR5P1	1.74982	2.28316	0.379914	6.00968	1.85891e-09	6.41334e-09	up
RN7SL180P	3.97455	1.72858	0.272081	6.35318	2.10909e-10	7.78894e-10	up
MIR3116-1	0.024553	0.00799476	2.54756	0.0031382	0.997496		none
MIR3116-2	0
PIGPP2	0.0330554	-0.00198008	2.07139	-0.000955918	0.999237		none
RPS15AP7	0.0525034	-0.00897217	1.3778	-0.00651193	0.994804		none
L1TD1	49.8898	-0.279555	0.169075	-1.65343	0.0982424	0.142172	none
AL162739.1	0.135277	-0.371181	0.695766	-0.533485	0.593698		none
KANK4	1168.79	-0.52629	0.16571	-3.17597	0.00149334	0.00291708	none
RNU6-371P	0.0937304	0.104704	1.57211	0.0666008	0.9469		none
USP1	4259.87	0.419048	0.0735091	5.70062	1.19371e-08	3.87669e-08	none
DOCK7	3164.98	-0.326638	0.0721918	-4.52458	6.05147e-06	1.55307e-05	none
AL451044.1	0.54511	0.334722	0.476443	0.702544	0.48234	0.574565	none
ANGPTL3	7.71676	0.117852	0.202148	0.583	0.559893	0.647698	none
AL138847.2	3.95138	0.612019	0.277278	2.20724	0.0272971	0.0440494	none
AL138847.1	1.4348	0.74036	0.268448	2.75793	0.00581695	0.010457	none
AC103923.1	6.86737	0.260887	0.168458	1.54867	0.12146	0.172276	none
ATG4C	754.9	-0.270253	0.0449704	-6.00958	1.86009e-09	6.41692e-09	none
AC099794.1	1.23389	0.0819911	0.174513	0.469828	0.638478	0.718239	none
AC099794.2	0.160691	-0.227577	0.514511	-0.442318	0.658259		none
LINC01739	0.149093	0.234329	1.068	0.219408	0.826332		none
AL162400.3	0.0976904	0.0921348	1.02832	0.0895975	0.928607		none
AL162400.1	0.0189667	0.0331206	3.81529	0.00868102	0.993074		none
AL162400.2	0.0522835	0.10094	1.71741	0.0587747	0.953132		none
AC096543.1	0.0471155	-0.00119385	1.19292	-0.00100078	0.999201		none
LINC00466	19.5427	3.94044	0.215838	18.2565	1.83782e-74	8.28444e-73	up
RNA5SP49	0.0269236	0.0257517	2.54067	0.0101358	0.991913		none
AC096543.2	2.34673	3.17658	0.287844	11.0358	2.5684e-28	2.40426e-27	up
RPSAP65	0.0038864	0.00717355	4.99129	0.00143721	0.998853		none
FOXD3-AS1	138.48	4.43328	0.212812	20.8319	2.22361e-96	1.81098e-94	up
FOXD3	27.9002	3.11146	0.237965	13.0752	4.56078e-39	6.57961e-38	up
MIR6068	0.0183654	0.0512854	2.57348	0.0199284	0.9841		none
AL049636.1	0.290846	0.46272	0.470095	0.984312	0.324962	0.41159	none
ALG6	1233.88	0.621595	0.0546443	11.3753	5.55133e-30	5.60921e-29	none
ITGB3BP	864.575	0.320393	0.056	5.7213	1.05712e-08	3.44869e-08	none
BX004807.1	2.29583	1.57564	0.290388	5.426	5.76308e-08	1.76906e-07	up
EFCAB7	479.361	-0.115309	0.0563124	-2.04766	0.0405935	0.0634873	none
RN7SL488P	0.180331	-0.0990447	0.444117	-0.223015	0.823524	0.866655	none
RNU7-123P	2.25582	-0.068431	0.150971	-0.453274	0.650352	0.728262	none
DLEU2L	20.4731	-0.399149	0.139696	-2.85727	0.00427298	0.00783002	none
AL109925.3	0
AL109925.6	0
AL109925.4	0
AL109925.2	0
AL109925.5	0
AL109925.1	0
PGM1	4137.39	-1.25624	0.0812969	-15.4525	7.25521e-54	1.73213e-52	down
RN7SL130P	6.43895	0.0519669	0.146589	0.354507	0.722959	0.788423	none
ROR1	420.221	-0.894035	0.124645	-7.17263	7.35715e-13	3.19719e-12	none
AL161742.1	2.31462	0.651911	0.251697	2.59006	0.0095959	0.0167025	none
CFL1P3	1.48506	1.65871	0.2874	5.77145	7.85929e-09	2.59066e-08	up
RNU6-809P	0.0708603	0.113504	2.55577	0.0444108	0.964577		none
ROR1-AS1	21.1871	0.67253	0.179384	3.7491	0.000177469	0.000388296	none
AL445205.1	4.26154	0.95649	0.429508	2.22694	0.0259512	0.0420221	none
UBE2U	2.10727	0.586851	0.512331	1.14545	0.252022	0.32994	none
RNU7-62P	0.00972375	0.0175508	4.63095	0.00378989	0.996976		none
CACHD1	1122.57	-2.09535	0.104034	-20.141	3.23011e-90	2.30034e-88	down
MIR4794	0.100503	-0.0103949	1.45175	-0.0071602	0.994287		none
RAVER2	1291.21	-0.464745	0.0896077	-5.18645	2.14344e-07	6.27833e-07	none
JAK1	12760.1	-0.633762	0.0551369	-11.4943	1.40867e-30	1.45145e-29	none
AL606517.2	1.23931	2.06058	0.788308	2.61392	0.00895098	0.0156493	up
AL606517.1	1.62787	2.22027	0.698337	3.17937	0.00147593	0.00288492	up
LINC01359	62.9542	-1.13032	0.155739	-7.25774	3.93606e-13	1.73879e-12	down
SLC2A3P2	9.02718	-1.04673	0.216875	-4.82641	1.3902e-06	3.79402e-06	down
AL357078.2	5.04321	-0.881592	0.195934	-4.49943	6.81352e-06	1.73917e-05	none
RNU6-1176P	1.07665	-0.18317	0.407001	-0.450047	0.652676	0.730268	none
MIR3671	7.31448	-1.14536	0.14057	-8.14802	3.69942e-16	1.93828e-15	down
MIR101-1	0.420205	-0.847526	0.350252	-2.41976	0.0155307	0.0261497	none
AL357078.1	0.199829	0.270746	0.388733	0.696481	0.486127	0.578252	none
MRPS21P1	0.210813	0.274643	0.380271	0.722229	0.470154	0.562382	none
AK4	2995.45	-1.02442	0.120883	-8.47446	2.36165e-17	1.3092e-16	down
RPS29P7	0.37946	-0.237869	0.528059	-0.450459	0.652379	0.730023	none
DNAJC6	356.795	0.732993	0.141304	5.18734	2.13318e-07	6.24887e-07	none
AL139294.1	0.425982	0.540269	0.596998	0.904976	0.365478	0.454685	none
COX6CP13	0.451658	0.774828	0.65024	1.1916	0.233417	0.308416	none
RNU2-15P	0.0248652	0.0309365	2.54589	0.0121515	0.990305		none
LEPROT	6461.47	-0.85318	0.0471091	-18.1107	2.62276e-73	1.14628e-71	none
LEPR	1107.24	-2.96697	0.115617	-25.6621	3.0958e-145	7.18195e-143	down
AC119800.1	2.26985	-0.485484	0.183054	-2.65214	0.00799827	0.0140925	none
AC097063.1	1.0005	-0.438024	0.463221	-0.945605	0.34435	0.432419	none
AL513493.1	1.60084	-0.850803	0.242505	-3.5084	0.000450808	0.000941288	none
RN7SL854P	0.345574	1.01244	1.38935	0.728714	0.466177	0.558411	none
PDE4B	3217.46	-0.30984	0.135929	-2.27943	0.0226417	0.0370458	none
PDE4B-AS1	1.06673	1.75071	0.719256	2.43406	0.0149305	0.0252111	up
RNU4-88P	0.194455	0.409122	1.32774	0.308133	0.757981	0.816191	none
SGIP1	429.121	0.588649	0.110531	5.32566	1.00586e-07	3.02635e-07	none
MIR3117	1.00826	0.851459	0.373931	2.27705	0.0227832	0.0372614	none
AL139147.1	11.5055	0.718509	0.177071	4.05773	4.9551e-05	0.000115332	none
TCTEX1D1	38.4924	-0.621864	0.0990684	-6.27712	3.44906e-10	1.25588e-09	none
INSL5	1.6903	0.731096	0.228757	3.19595	0.00139372	0.00273329	none
DNAI4	406.74	0.22459	0.09102	2.46748	0.0136068	0.0231239	none
AL592161.1	0.283025	0.348691	0.61336	0.568494	0.5697	0.656785	none
MIER1	3000.71	-0.198288	0.0500085	-3.96508	7.33707e-05	0.000167497	none
SLC35D1	1966.82	0.296317	0.0639551	4.6332	3.60049e-06	9.45705e-06	none
C1orf141	0.753897	1.43853	0.499873	2.87779	0.00400476	0.00737027	up
AL133320.1	0.0169481	-0.0741959	3.60826	-0.0205628	0.983594		none
AL133320.2	0.588832	0.682488	0.37199	1.83469	0.066551	0.0997016	none
IL23R	4.32374	-0.445036	0.184236	-2.41558	0.01571	0.0264254	none
RNU6-586P	0.0125859	-0.0360953	3.91295	-0.00922458	0.99264		none
RNU4ATAC4P	0.0265989	-0.03569	2.87104	-0.012431	0.990082		none
DNAJB6P4	0.255852	0.052063	0.322902	0.161235	0.871909	0.904273	none
IL12RB2	411.518	1.37137	0.214179	6.40292	1.52433e-10	5.68839e-10	up
SERBP1	17200.6	0.0213198	0.0509547	0.418408	0.675649	0.749693	none
RNU6-387P	2.82462	-0.106934	0.144687	-0.739073	0.459863	0.552258	none
LINC01702	0.164895	0.289247	0.738886	0.391463	0.695455	0.766049	none
RNU6-1031P	0.0165882	0.033124	3.61204	0.00917043	0.992683		none
AL590559.1	0.0581645	0.0913545	1.06654	0.085655	0.931741		none
RN7SL392P	0.0478496	0.0498675	2.18598	0.0228124	0.9818		none
HNRNPCP9	0.236748	-0.162945	0.363426	-0.448359	0.653894	0.731283	none
GADD45A	1439.87	-0.261786	0.088891	-2.94502	0.00322934	0.00601868	none
GNG12	7428.99	-0.796909	0.0812776	-9.80478	1.07382e-22	7.76522e-22	none
RNU7-80P	0.756387	0.588239	0.946321	0.621607	0.5342	0.624106	none
GNG12-AS1	45.1423	-1.70441	0.11511	-14.8068	1.32412e-49	2.78363e-48	down
AL157407.1	0.294832	-0.265	0.434427	-0.609998	0.541863	0.6314	none
DIRAS3	219.419	-0.707161	0.176487	-4.00687	6.15282e-05	0.000141829	none
ARL5AP3	1.00926	-1.47852	0.215635	-6.8566	7.05203e-12	2.8791e-11	down
WLS	3281.71	-1.29944	0.118088	-11.004	3.65527e-28	3.40364e-27	down
CTBP2P8	7.45797	-1.28202	0.132113	-9.70393	2.90092e-22	2.05222e-21	down
MIR1262	0.39078	-0.767153	0.564545	-1.35889	0.174182	0.237945	none
RPS7P4	19.5821	-0.471477	0.0980655	-4.80778	1.52618e-06	4.15109e-06	none
COX6B1P7	0.0148944	0.0357193	3.42801	0.0104199	0.991686		none
ELOCP18	0.0700499	0.129851	1.0524	0.123386	0.901802		none
AL139413.1	0.0354208	0.0105852	2.7212	0.00388991	0.996896		none
RPE65	6.98091	-2.6259	0.243225	-10.7962	3.58734e-27	3.18232e-26	down
DEPDC1	686.887	3.28173	0.126956	25.8494	2.47217e-147	5.88376e-145	up
AL138789.1	3.31048	3.27307	0.256972	12.7371	3.67902e-37	4.97328e-36	up
DEPDC1-AS1	3.62933	2.86516	0.256975	11.1496	7.19359e-29	6.88971e-28	up
TXNP2	0.0437708	-0.024528	1.57837	-0.0155401	0.987601		none
AL035412.1	0.557783	1.40299	0.402857	3.48259	0.000496582	0.00103133	up
AL033530.1	9.8253	4.71691	0.456126	10.3412	4.5856e-25	3.71621e-24	up
AL691520.1	0.390627	1.02362	0.672648	1.52178	0.128065	0.180717	none
LINC01707	0.426816	-0.960865	0.388798	-2.47137	0.0134597	0.0228941	none
LINC02791	0.0729005	0.109105	2.04185	0.0534344	0.957386		none
LINC01758	0.102919	-0.163209	1.10047	-0.148309	0.882099		none
AL359894.1	1.11011	1.73253	0.667654	2.59495	0.00946057	0.0164825	up
LRRC7	41.4923	-0.321286	0.108058	-2.97328	0.00294634	0.00552125	none
SGO1P1	0.178072	0.288379	1.61307	0.178776	0.858113	0.893426	none
AL117353.1	0.344927	0.632487	0.813051	0.777918	0.436617	0.528641	none
RN7SL538P	0.326872	0.675245	1.35277	0.499156	0.617669	0.699888	none
PIN1P1	0.271481	0.269921	0.417624	0.646327	0.518068	0.608991	none
LRRC7-AS1	0.111238	-0.112532	1.45077	-0.0775671	0.938172		none
LRRC40	996.727	-0.020399	0.0540328	-0.37753	0.70578	0.774488	none
RN7SL242P	0.364356	0.66983	0.745593	0.898386	0.36898	0.458383	none
SRSF11	8638.25	-0.0345305	0.042517	-0.812157	0.416702	0.508279	none
AL353771.1	1.38579	0.725306	0.39721	1.826	0.0678503	0.101466	none
ANKRD13C	1704.13	-0.0531769	0.0408487	-1.3018	0.192984	0.260561	none
HHLA3	465.801	0.263005	0.0795652	3.30552	0.00094799	0.00189862	none
HHLA3-AS1	3.80315	-0.12813	0.134173	-0.954965	0.339596	0.427428	none
CTH	234.198	-0.392593	0.0832529	-4.71567	2.40915e-06	6.42636e-06	none
AL354872.1	11.7861	-0.127791	0.110183	-1.1598	0.246131	0.323142	none
CHORDC1P5	0.194431	0.117115	0.449342	0.260636	0.794373	0.844723	none
CASP3P1	0.0444365	0.0442951	1.89567	0.0233665	0.981358		none
LINC01788	10.2702	1.68711	0.19197	8.78842	1.51675e-18	8.9241e-18	up
AL513285.1	0.0234276	-0.0101562	2.88623	-0.00351885	0.997192		none
PTGER3	2610.23	-1.41684	0.157589	-8.99076	2.45528e-19	1.49815e-18	down
AL031429.1	4.38917	-1.86992	0.211109	-8.85758	8.17678e-19	4.86707e-18	down
AL031429.2	38.5728	-0.556618	0.183902	-3.02671	0.00247235	0.00468522	none
ZRANB2-AS1	6.68599	-0.698091	0.127734	-5.46518	4.62444e-08	1.43197e-07	none
ZRANB2	3942.95	-0.314963	0.0451112	-6.98193	2.91157e-12	1.21959e-11	none
MIR186	16.3732	-1.00263	0.134632	-7.44717	9.53632e-14	4.35212e-13	down
ZRANB2-AS2	60.188	-0.0216093	0.0996948	-0.216754	0.8284	0.87053	none
AL358453.1	0.278374	0.225252	0.478346	0.470898	0.637714	0.71752	none
NEGR1	983.936	-1.07372	0.141153	-7.60681	2.80951e-14	1.32456e-13	down
AL354949.1	0.777041	1.09001	0.54903	1.98534	0.0471068	0.0727036	none
AL359821.1	0.177127	0.178876	0.701549	0.254974	0.798744	0.848076	none
NEGR1-IT1	0.145541	0.0925227	1.42318	0.0650113	0.948165		none
GDI2P2	4.46887	0.554107	0.144191	3.84286	0.000121607	0.000271371	none
AL513166.1	7.713	-0.942278	0.15667	-6.01439	1.80561e-09	6.23711e-09	none
RPL31P12	0.681073	-0.29146	0.256941	-1.13435	0.256649	0.335188	none
AL583808.1	3.12028	2.04781	0.444939	4.60244	4.17569e-06	1.08987e-05	up
RNU6-1246P	0.0610145	0.0953578	2.47243	0.0385685	0.969234		none
LINC02796	0.296442	0.519808	0.765508	0.679037	0.497115	0.588866	none
LINC02797	0.369506	0.634051	0.587654	1.07895	0.280608	0.362453	none
AL732618.1	0.019498	-0.0841598	2.30592	-0.0364972	0.970886		none
KRT8P21	0.623709	0.974889	0.268908	3.62536	0.000288558	0.000616437	none
RN7SKP19	0.0161487	0.0357195	3.41295	0.0104659	0.99165		none
LINC01360	0.117082	0.141781	1.06455	0.133184	0.894048		none
LINC02238	0.0714223	0.00956497	1.37722	0.00694515	0.994459		none
RNA5SP50	0.0220393	0.0279185	4.72055	0.00591424	0.995281		none
AL591463.1	1.14215	-3.74287	0.312069	-11.9937	3.83337e-33	4.39546e-32	down
RNU4ATAC8P	0.00514438	-0.0235444	4.99129	-0.00471711	0.996236		none
LRRIQ3	89.975	-0.455954	0.103849	-4.39057	1.13055e-05	2.81818e-05	none
FPGT	1088.06	0.237115	0.0540824	4.38432	1.16347e-05	2.89553e-05	none
FPGT-TNNI3K	35.7659	-1.19954	0.13187	-9.09637	9.33985e-20	5.82982e-19	down
TNNI3K	2.35915	-0.355463	0.177407	-2.00366	0.0451066	0.0698653	none
AC093158.1	2.96466	-0.804989	0.170595	-4.71871	2.37348e-06	6.33525e-06	none
AC105271.1	1.56016	-0.991997	0.225091	-4.40709	1.04768e-05	2.62257e-05	none
LRRC53	3.92985	2.29046	0.460617	4.9726	6.60592e-07	1.85441e-06	up
ERICH3	219.589	0.147133	0.243731	0.603669	0.546064	0.635197	none
ERICH3-AS1	0.662861	0.201676	0.396578	0.508542	0.611073	0.694125	none
AC135803.1	12.5565	-0.709599	0.132495	-5.35566	8.52427e-08	2.58179e-07	none
CRYZ	2189.5	0.013833	0.0722373	0.191493	0.848139	0.88566	none
TYW3	1401.09	-0.423014	0.049173	-8.60257	7.79489e-18	4.42475e-17	none
AC133865.1	0.076198	0.160173	2.03954	0.0785341	0.937403		none
AC099786.3	0.391265	0.182531	0.90404	0.201906	0.83999	0.87951	none
AC099786.1	0.410881	-0.0226668	0.6281	-0.0360878	0.971212	0.978992	none
LHX8	9.88467	1.13535	0.294036	3.86127	0.000112798	0.00025255	up
AC099786.2	0.556278	0.408666	0.491654	0.831207	0.405857	0.497084	none
[truncated: 57,429 more rows]
